# Supplementary material for: High-Fat Diet Induces Pre-Diabetes and Distinct Sex-Specific Metabolic Alterations in Negr1-Deficient Mice
Source: Biomedicines. 2021 Sep 3;9(9):1148. doi: 10.3390/biomedicines9091148 (PMC8466019; doi:10.3390/biomedicines9091148)
Supplement: Supplementary file 1 [file biomedicines-09-01148-s001.zip › Supplementary table S1.pdf]

| Metabolites                        | Sex    |                         |                        |                         |                        | Two-way ANOVA   |       |         |
|------------------------------------|--------|-------------------------|------------------------|-------------------------|------------------------|-----------------|-------|---------|
|                                    |        | Normal diet             |                        | HFD                     |                        |                 |       |         |
|                                    |        | Wild type<br>Mean ± SEM | Negr1-/-<br>Mean ± SEM | Wild type<br>Mean ± SEM | Negr1-/-<br>Mean ± SEM |                 | F     | p       |
| Acylcarnitines                     |        |                         |                        |                         |                        |                 |       |         |
| Carnitine (C0)                     | Male   | 21.4 ± 1.1              | 20.7 ± 1.3             | 14.1 ± 0.7              | 14.0 ± 1.1             | Diet            | 43.95 | <0.0001 |
|                                    |        |                         |                        |                         |                        | Genotype        | 0.125 | 0.7258  |
|                                    |        |                         |                        |                         |                        | Diet X genotype | 0.078 | 0.7826  |
|                                    | Female | 17.7 ± 1.3              | 17.1 ± 1.0             | 11.5 ± 0.8              | 9.3 ± 0.5              | Diet            | 53.14 | <0.0001 |
|                                    |        |                         |                        |                         |                        | Genotype        | 1.986 | 0.1676  |
|                                    |        |                         |                        |                         |                        | Diet X genotype | 0.636 | 0.4305  |
| Acetylcarnitine (C2)               | Male   | 11.3 ± 0.9              | 12.4 ± 0.9             | 6.1 ± 0.3               | 6.6 ± 0.5              | Diet            | 59.11 | <0.0001 |
|                                    |        |                         |                        |                         |                        | Genotype        | 1.055 | 0.3112  |
|                                    |        |                         |                        |                         |                        | Diet X genotype | 0.163 | 0.6887  |
|                                    | Female | 15.2 ± 1.3              | 10.7 ± 0.8             | 4.9 ± 0.2               | 4.2 ± 0.3              | Diet            | 118.7 | <0.0001 |
|                                    |        |                         |                        |                         |                        | Genotype        | 11.73 | 0.0016  |
|                                    |        |                         |                        |                         |                        | Diet X genotype | 6.421 | 0.0159  |
| Propionyl-carnitine (C3)           | Male   | 0.4 ± 0.02              | 0.5 ± 0.04             | 0.3 ± 0.03              | 0.3 ± 0.02             | Diet            | 30.95 | <0.0001 |
|                                    |        |                         |                        |                         |                        | Genotype        | 8.642 | 0.0057  |
|                                    |        |                         |                        |                         |                        | Diet X genotype | 3.020 | 0.0908  |
|                                    | Female | 0.5 ± 0.04              | 0.5 ± 0.04             | 0.2 ± 0.01              | 0.2 ± 0.02             | Diet            | 78.78 | <0.0001 |
|                                    |        |                         |                        |                         |                        | Genotype        | 0.823 | 0.3705  |
|                                    |        |                         |                        |                         |                        | Diet X genotype | 0.042 | 0.8390  |
| Hydroxybuturyl-carnitine (C3-DC)   | Male   | 0.08 ± 0.006            | 0.09 ± 0.008           | 0.07 ± 0.009            | 0.08 ± 0.007           | Diet            | 3.115 | 0.0860  |
|                                    |        |                         |                        |                         |                        | Genotype        | 1.709 | 0.1993  |
|                                    |        |                         |                        |                         |                        | Diet X genotype | 0.017 | 0.8967  |
|                                    | Female | 0.09 ± 0.01             | 0.07 ± 0.005           | 0.06 ± 0.005            | 0.06 ± 0.006           | Diet            | 8.097 | 0.0074  |
|                                    |        |                         |                        |                         |                        | Genotype        | 0.247 | 0.6226  |
|                                    |        |                         |                        |                         |                        | Diet X genotype | 0.565 | 0.4573  |
| Hydroxypropionyl-carnitine (C3-OH) | Male   | 0.06 ± 0.03             | 0.05 ± 0.006           | 0.05 ± 0.006            | 0.06 ± 0.005           | Diet            | 0.313 | 0.5793  |
|                                    |        |                         |                        |                         |                        | Genotype        | 0.040 | 0.8433  |
|                                    |        |                         |                        |                         |                        | Diet X genotype | 2.508 | 0.1220  |
|                                    | Female | 0.04 ± 0.004            | 0.04 ± 0.005           | 0.06 ± 0.005            | 0.05 ± 0.005           | Diet            | 8.410 | 0.0064  |
|                                    |        |                         |                        |                         |                        | Genotype        | 0.698 | 0.4092  |

|                                                        |        |              |              |              |              |                 |        |                   |
|--------------------------------------------------------|--------|--------------|--------------|--------------|--------------|-----------------|--------|-------------------|
|                                                        |        |              |              |              |              | Diet X genotype | 0.660  | 0.4222            |
| Butyryl- and isobutyrylcarnitine (C4-)                 | Male   | 0.6 ± 0.09   | 0.6 ± 0.04   | 0.4 ± 0.04   | 0.4 ± 0.03   | Diet            | 16.09  | <b>0.0003</b>     |
|                                                        |        |              |              |              |              | Genotype        | 0.002  | 0.9641            |
|                                                        |        |              |              |              |              | Diet X genotype | 0.2796 | 0.6002            |
|                                                        | Female | 0.6 ± 0.05   | 0.5 ± 0.03   | 0.3 ± 0.02   | 0.3 ± 0.01   | Diet            | 58.70  | <b>&lt;0.0001</b> |
|                                                        |        |              |              |              |              | Genotype        | 2.943  | 0.0951            |
|                                                        |        |              |              |              |              | Diet X genotype | 0.0007 | 0.9323            |
| Propenoylcarnitine (C3:1)                              | Male   | 0.04 ± 0.003 | 0.05 ± 0.002 | 0.04 ± 0.005 | 0.05 ± 0.005 | Diet            | 0.169  | 0.6831            |
|                                                        |        |              |              |              |              | Genotype        | 3.923  | 0.0553            |
|                                                        |        |              |              |              |              | Diet X genotype | 1.167  | 0.2872            |
|                                                        | Female | 0.04 ± 0.004 | 0.04 ± 0.004 | 0.05 ± 0.006 | 0.05 ± 0.005 | Diet            | 1.136  | 0.2939            |
|                                                        |        |              |              |              |              | Genotype        | 0.095  | 0.7595            |
|                                                        |        |              |              |              |              | Diet X genotype | 0.154  | 0.6970            |
| Butenoylcarnitine (C4:1)                               | Male   | 0.06 ± 0.003 | 0.07 ± 0.009 | 0.06 ± 0.004 | 0.07 ± 0.006 | Diet            | 0.492  | 0.4875            |
|                                                        |        |              |              |              |              | Genotype        | 1.461  | 0.2346            |
|                                                        |        |              |              |              |              | Diet X genotype | 0.032  | 0.8601            |
|                                                        | Female | 0.06 ± 0.005 | 0.05 ± 0.003 | 0.06 ± 0.004 | 0.07 ± 0.006 | Diet            | 9.094  | <b>0.0048</b>     |
|                                                        |        |              |              |              |              | Genotype        | 0.184  | 0.6709            |
|                                                        |        |              |              |              |              | Diet X genotype | 4.187  | <b>0.0483</b>     |
| Isovalerylcarnitine and 2-methylbutyrylcarnitine (C5-) | Male   | 0.2 ± 0.01   | 0.2 ± 0.01   | 0.2 ± 0.02   | 0.2 ± 0.02   | Diet            | 0.596  | 0.4452            |
|                                                        |        |              |              |              |              | Genotype        | 0.146  | 0.7042            |
|                                                        |        |              |              |              |              | Diet X genotype | 0.606  | 0.4415            |
|                                                        | Female | 0.2 ± 0.03   | 0.2 ± 0.01   | 0.2 ± 0.01   | 0.2 ± 0.02   | Diet            | 5.922  | <b>0.0202</b>     |
|                                                        |        |              |              |              |              | Genotype        | 1.089  | 0.3038            |
|                                                        |        |              |              |              |              | Diet X genotype | 0.224  | 0.6390            |
| Glutarylcarnitine (C5-DC)                              | Male   | 0.04 ± 0.004 | 0.03 ± 0.004 | 0.03 ± 0.003 | 0.04 ± 0.004 | Diet            | 0.024  | 0.8789            |
|                                                        |        |              |              |              |              | Genotype        | 0.0006 | 0.9797            |
|                                                        |        |              |              |              |              | Diet X genotype | 5.777  | <b>0.0215</b>     |
|                                                        | Female | 0.04 ± 0.006 | 0.03 ± 0.005 | 0.03 ± 0.003 | 0.03 ± 0.004 | Diet            | 0.599  | 0.4442            |
|                                                        |        |              |              |              |              | Genotype        | 0.409  | 0.5266            |
|                                                        |        |              |              |              |              | Diet X genotype | 0.002  | 0.9629            |
| Hydroxyvaleryl-carnitine (C5:1)                        | Male   | 0.1 ± 0.01   | 0.1 ± 0.006  | 0.1 ± 0.008  | 0.1 ± 0.008  | Diet            | 1.190  | 0.2826            |
|                                                        |        |              |              |              |              | Genotype        | 0.088  | 0.7686            |
|                                                        |        |              |              |              |              | Diet X genotype | 3.699  | 0.0624            |

|                               |        |               |              |               |              |                                     |                         |                                   |
|-------------------------------|--------|---------------|--------------|---------------|--------------|-------------------------------------|-------------------------|-----------------------------------|
|                               | Female | 0.1 ± 0.01    | 0.1 ± 0.007  | 0.1 ± 0.008   | 0.1 ± 0.005  | Diet<br>Genotype<br>Diet X genotype | 4.018<br>6.759<br>0.059 | 0.0528<br><b>0.0136</b><br>0.8101 |
| Tiglylcarnitine (C5:1)        | Male   | 0.05 ± 0.003  | 0.06 ± 0.003 | 0.05 ± 0.005  | 0.06 ± 0.005 | Diet<br>Genotype<br>Diet X genotype | 0.139<br>2.851<br>0.002 | 0.7117<br>0.0999<br>0.9607        |
|                               | Female | 0.05 ± 0.005  | 0.06 ± 0.005 | 0.06 ± 0.003  | 0.06 ± 0.006 | Diet<br>Genotype<br>Diet X genotype | 0.714<br>1.238<br>0.061 | 0.4037<br>0.2732<br>0.8061        |
| Glutaconylcarnitine (C5:1-DC) | Male   | 0.04 ± 0.003  | 0.04 ± 0.004 | 0.04 ± 0.004  | 0.05 ± 0.004 | Diet<br>Genotype<br>Diet X genotype | 2.943<br>1.884<br>3.221 | 0.0948<br>0.1784<br>0.0811        |
|                               | Female | 0.05 ± 0.005  | 0.04 ± 0.004 | 0.05 ± 0.004  | 0.05 ± 0.003 | Diet<br>Genotype<br>Diet X genotype | 0.024<br>1.689<br>1.883 | 0.8790<br>0.2022<br>0.1787        |
| Hexanoylcarnitine (C6)        | Male   | 0.02 ± 0.002  | 0.07 ± 0.02  | 0.02 ± 0.002  | 0.02 ± 0.002 | Diet<br>Genotype<br>Diet X genotype | 3.985<br>4.204<br>3.669 | 0.0535<br>0.0477<br>0.0634        |
|                               | Female | 0.04 ± 0.02   | 0.02 ± 0.002 | 0.02 ± 0.001  | 0.02 ± 0.001 | Diet<br>Genotype<br>Diet X genotype | 2.242<br>1.879<br>1.146 | 0.1433<br>0.1792<br>0.2917        |
| Hexenoylcarnitine (C6:1)      | Male   | 0.01 ± 0.0005 | 0.01 ± 0.001 | 0.01 ± 0.0007 | 0.01 ± 0.001 | Diet<br>Genotype<br>Diet X genotype | 2.528<br>1.784<br>2.949 | 0.1206<br>0.1901<br>0.0945        |
|                               | Female | 0.01 ± 0.0008 | 0.01 ± 0.001 | 0.01 ± 0.001  | 0.01 ± 0.001 | Diet<br>Genotype<br>Diet X genotype | 2.147<br>0.068<br>1.200 | 0.2807<br>0.7962<br>0.2807        |
| Pimelylcarnitine (C7-DC)      | Male   | 0.03 ± 0.003  | 0.03 ± 0.002 | 0.02 ± 0.002  | 0.02 ± 0.002 | Diet<br>Genotype<br>Diet X genotype | 6.114<br>0.078<br>3.033 | <b>0.0183</b><br>0.7815<br>0.0901 |
|                               | Female | 0.02 ± 0.003  | 0.02 ± 0.002 | 0.02 ± 0.004  | 0.02 ± 0.003 | Diet<br>Genotype<br>Diet X genotype | 0.462<br>0.368<br>0.753 | 0.5014<br>0.5483<br>0.3916        |

|                              |        |              |              |              |              |                 |       |        |
|------------------------------|--------|--------------|--------------|--------------|--------------|-----------------|-------|--------|
| Octanoylcarnitine (C8)       | Male   | 0.2 ± 0.008  | 0.2 ± 0.01   | 0.2 ± 0.008  | 0.2 ± 0.006  | Diet            | 2.489 | 0.1234 |
|                              |        |              |              |              |              | Genotype        | 0.726 | 0.3997 |
|                              |        |              |              |              |              | Diet X genotype | 0.070 | 0.7926 |
|                              | Female | 0.2 ± 0.007  | 0.2 ± 0.009  | 0.2 ± 0.008  | 0.1 ± 0.006  | Diet            | 0.005 | 0.9459 |
|                              |        |              |              |              |              | Genotype        | 0.054 | 0.8173 |
|                              |        |              |              |              |              | Diet X genotype | 3.324 | 0.0768 |
| Nonanoylcarnitine (C9)       | Male   | 0.06 ± 0.003 | 0.05 ± 0.004 | 0.06 ± 0.006 | 0.05 ± 0.005 | Diet            | 0.610 | 0.4399 |
|                              |        |              |              |              |              | Genotype        | 1.421 | 0.2411 |
|                              |        |              |              |              |              | Diet X genotype | 0.015 | 0.9025 |
|                              | Female | 0.06 ± 0.007 | 0.05 ± 0.005 | 0.05 ± 0.005 | 0.06 ± 0.006 | Diet            | 0.134 | 0.7167 |
|                              |        |              |              |              |              | Genotype        | 0.293 | 0.5920 |
|                              |        |              |              |              |              | Diet X genotype | 0.646 | 0.4271 |
| Decanoylcarnitine (C10)      | Male   | 0.1 ± 0.006  | 0.2 ± 0.01   | 0.16 ± 0.015 | 0.18 ± 0.01  | Diet            | 0.605 | 0.4418 |
|                              |        |              |              |              |              | Genotype        | 7.033 | 0.0118 |
|                              |        |              |              |              |              | Diet X genotype | 0.064 | 0.8017 |
|                              | Female | 0.2 ± 0.005  | 0.2 ± 0.008  | 0.16 ± 0.007 | 0.17 ± 0.01  | Diet            | 0.631 | 0.4324 |
|                              |        |              |              |              |              | Genotype        | 0.906 | 0.3476 |
|                              |        |              |              |              |              | Diet X genotype | 0.105 | 0.7483 |
| Decenoylcarnitine (C10:1)    | Male   | 0.07 ± 0.006 | 0.07 ± 0.005 | 0.06 ± 0.006 | 0.08 ± 0.004 | Diet            | 0.190 | 0.6659 |
|                              |        |              |              |              |              | Genotype        | 2.336 | 0.1351 |
|                              |        |              |              |              |              | Diet X genotype | 1.020 | 0.3194 |
|                              | Female | 0.08 ± 0.005 | 0.07 ± 0.005 | 0.07 ± 0.007 | 0.06 ± 0.005 | Diet            | 2.160 | 0.1505 |
|                              |        |              |              |              |              | Genotype        | 5.226 | 0.0284 |
|                              |        |              |              |              |              | Diet X genotype | 0.249 | 0.6211 |
| Decadienyl-carnitine (C10:2) | Male   | 0.03 ± 0.002 | 0.03 ± 0.002 | 0.03 ± 0.003 | 0.03 ± 0.004 | Diet            | 0.782 | 0.3823 |
|                              |        |              |              |              |              | Genotype        | 2.108 | 0.1552 |
|                              |        |              |              |              |              | Diet X genotype | 1.250 | 0.2709 |
|                              | Female | 0.04 ± 0.004 | 0.03 ± 0.003 | 0.04 ± 0.006 | 0.03 ± 0.004 | Diet            | 0.112 | 0.7394 |
|                              |        |              |              |              |              | Genotype        | 4.488 | 0.0413 |
|                              |        |              |              |              |              | Diet X genotype | 0.046 | 0.8323 |
| Dodecanoyl-carnitine (C12)   | Male   | 0.07 ± 0.005 | 0.08 ± 0.004 | 0.07 ± 0.005 | 0.07 ± 0.007 | Diet            | 1.522 | 0.2253 |
|                              |        |              |              |              |              | Genotype        | 0.843 | 0.3647 |
|                              |        |              |              |              |              | Diet X genotype | 0.772 | 0.3855 |
|                              | Female | 0.07 ± 0.003 | 0.06 ± 0.007 | 0.06 ± 0.006 | 0.05 ± 0.004 | Diet            | 2.779 | 0.1044 |

|                                                 |        |              |              |              |              |                        |       |               |
|-------------------------------------------------|--------|--------------|--------------|--------------|--------------|------------------------|-------|---------------|
|                                                 |        |              |              |              |              | <b>Genotype</b>        | 2.959 | 0.0942        |
|                                                 |        |              |              |              |              | <b>Diet X genotype</b> | 0.007 | 0.9353        |
| Dodecanedioyl-<br>carnitine (C12-DC)            | Male   | 0.09 ± 0.008 | 0.09 ± 0.006 | 0.10 ± 0.004 | 0.09 ± 0.008 | <b>Diet</b>            | 0.876 | 0.3555        |
|                                                 |        |              |              |              |              | <b>Genotype</b>        | 0.530 | 0.4713        |
|                                                 |        |              |              |              |              | <b>Diet X genotype</b> | 0.530 | 0.4713        |
|                                                 | Female | 0.08 ± 0.006 | 0.09 ± 0.005 | 0.10 ± 0.008 | 0.08 ± 0.007 | <b>Diet</b>            | 0.590 | <b>0.0367</b> |
|                                                 |        |              |              |              |              | <b>Genotype</b>        | 0.009 | 0.9263        |
|                                                 |        |              |              |              |              | <b>Diet X genotype</b> | 4.717 | 0.4477        |
| Dodecenoyl-<br>Carnitine (C12:1)                | Male   | 0.6 ± 0.005  | 0.05 ± 0.005 | 0.05 ± 0.004 | 0.06 ± 0.004 | <b>Diet</b>            | 0.018 | 0.8942        |
|                                                 |        |              |              |              |              | <b>Genotype</b>        | 0.066 | 0.7983        |
|                                                 |        |              |              |              |              | <b>Diet X genotype</b> | 0.345 | 0.5608        |
|                                                 | Female | 0.06 ± 0.007 | 0.04 ± 0.003 | 0.04 ± 0.003 | 0.04 ± 0.003 | <b>Diet</b>            | 3.042 | 0.0899        |
|                                                 |        |              |              |              |              | <b>Genotype</b>        | 2.785 | 0.1041        |
|                                                 |        |              |              |              |              | <b>Diet X genotype</b> | 2.337 | 0.1354        |
| Tetradecanoyl-<br>carnitine (C14)               | Male   | 0.06 ± 0.009 | 0.06 ± 0.005 | 0.05 ± 0.004 | 0.06 ± 0.005 | <b>Diet</b>            | 2.330 | 0.1356        |
|                                                 |        |              |              |              |              | <b>Genotype</b>        | 1.388 | 0.2465        |
|                                                 |        |              |              |              |              | <b>Diet X genotype</b> | 0.377 | 0.5431        |
|                                                 | Female | 0.06 ± 0.008 | 0.05 ± 0.006 | 0.05 ± 0.004 | 0.03 ± 0.003 | <b>Diet</b>            | 10.96 | <b>0.0022</b> |
|                                                 |        |              |              |              |              | <b>Genotype</b>        | 5.097 | <b>0.0303</b> |
|                                                 |        |              |              |              |              | <b>Diet X genotype</b> | 0.125 | 0.7262        |
| Tetradecenoyl-<br>carnitine (C14:1)             | Male   | 0.06 ± 0.008 | 0.06 ± 0.007 | 0.05 ± 0.006 | 0.05 ± 0.007 | <b>Diet</b>            | 0.482 | 0.4920        |
|                                                 |        |              |              |              |              | <b>Genotype</b>        | 0.130 | 0.7202        |
|                                                 |        |              |              |              |              | <b>Diet X genotype</b> | 0.308 | 0.5821        |
|                                                 | Female | 0.04 ± 0.01  | 0.04 ± 0.01  | 0.05 ± 0.004 | 0.04 ± 0.006 | <b>Diet</b>            | 0.498 | 0.4850        |
|                                                 |        |              |              |              |              | <b>Genotype</b>        | 3.628 | 0.0651        |
|                                                 |        |              |              |              |              | <b>Diet X genotype</b> | 0.012 | 0.9140        |
| Hydroxytetra-<br>decenoylcarnitine<br>(14:1-OH) | Male   | 0.02 ± 0.002 | 0.02 ± 0.003 | 0.01 ± 0.003 | 0.02 ± 0.003 | <b>Diet</b>            | 0.038 | 0.8461        |
|                                                 |        |              |              |              |              | <b>Genotype</b>        | 4.780 | <b>0.0354</b> |
|                                                 |        |              |              |              |              | <b>Diet X genotype</b> | 1.418 | 0.2415        |
|                                                 | Female | 0.02 ± 0.003 | 0.02 ± 0.004 | 0.01 ± 0.002 | 0.02 ± 0.003 | <b>Diet</b>            | 2.981 | 0.0931        |
|                                                 |        |              |              |              |              | <b>Genotype</b>        | 0.526 | 0.4732        |
|                                                 |        |              |              |              |              | <b>Diet X genotype</b> | 1.161 | 0.2886        |
| Tetradecadienyl-<br>carnitine (14:2)            | Male   | 0.02 ± 0.004 | 0.02 ± 0.003 | 0.02 ± 0.003 | 0.01 ± 0.003 | <b>Diet</b>            | 1.412 | 0.2425        |
|                                                 |        |              |              |              |              | <b>Genotype</b>        | 1.412 | 0.2425        |

|                                                    |        |              |              |              |              |                                                        |                                  |                                       |
|----------------------------------------------------|--------|--------------|--------------|--------------|--------------|--------------------------------------------------------|----------------------------------|---------------------------------------|
|                                                    | Female | 0.02 ± 0.002 | 0.02 ± 0.003 | 0.01 ± 0.002 | 0.01 ± 0.002 | Diet X genotype<br>Diet<br>Genotype<br>Diet X genotype | 0.016<br>0.886<br>0.065<br>0.007 | 0.9021<br>0.3531<br>0.8002<br>0.9340  |
| Hydroxytetra-<br>decadienylcarnitine<br>(C14:2-OH) | Male   | 0.02 ± 0.003 | 0.02 ± 0.003 | 0.02 ± 0.003 | 0.02 ± 0.003 | Diet<br>Genotype<br>Diet X genotype                    | 0.138<br>0.848<br>0.357          | 0.7124<br>0.3632<br>0.5537            |
|                                                    | Female | 0.01 ± 0.003 | 0.02 ± 0.004 | 0.02 ± 0.003 | 0.02 ± 0.003 | Diet<br>Genotype<br>Diet X genotype                    | 0.315<br>1.571<br>0.016          | 0.5781<br>0.2184<br>0.8997            |
| Hexadecanoyl-<br>carnitine (C16)                   | Male   | 0.17 ± 0.02  | 0.15 ± 0.02  | 0.14 ± 0.009 | 0.18 ± 0.01  | Diet<br><br>Genotype<br>Diet X genotype                | 5.062<br>e-005<br>0.869<br>4.678 | 0.9944<br><br>0.3575<br><b>0.0373</b> |
|                                                    | Female | 0.14 ± 0.02  | 0.13 ± 0.01  | 0.13 ± 0.009 | 0.11 ± 0.009 | Diet<br>Genotype<br>Diet X genotype                    | 1.781<br>2.058<br>0.141          | 0.1907<br>0.1603<br>0.7097            |
| Hydroxyhexa-<br>decanoylcarnitine<br>(C16-OH)      | Male   | 0.03 ± 0.006 | 0.03 ± 0.005 | 0.03 ± 0.002 | 0.03 ± 0.005 | Diet<br>Genotype<br>Diet X genotype                    | 0.231<br>0.110<br>0.252          | 0.6335<br>0.7423<br>0.6185            |
|                                                    | Female | 0.03 ± 0.003 | 0.02 ± 0.003 | 0.03 ± 0.003 | 0.02 ± 0.004 | Diet<br>Genotype<br>Diet X genotype                    | 0.212<br>3.397<br>0.518          | 0.6478<br>0.0738<br>0.4763            |
| Hexadecenoyl-<br>carnitine (C16:1)                 | Male   | 0.05 ± 0.005 | 0.05 ± 0.007 | 0.05 ± 0.006 | 0.04 ± 0.006 | Diet<br>Genotype<br>Diet X genotype                    | 3.003<br>0.140<br>0.693          | 0.0917<br>0.7108<br>0.4107            |
|                                                    | Female | 0.06 ± 0.007 | 0.05 ± 0.006 | 0.04 ± 0.003 | 0.03 ± 0.007 | Diet<br>Genotype<br>Diet X genotype                    | 6.603<br>1.522<br>0.757          | <b>0.0146</b><br>0.2255<br>0.3902     |
| Hydroxyhexa-<br>decenoylcarnitine<br>(C16:1-OH)    | Male   | 0.03 ± 0.003 | 0.02 ± 0.003 | 0.02 ± 0.002 | 0.01 ± 0.003 | Diet<br>Genotype<br>Diet X genotype                    | 4.499<br>3.738<br>0.592          | 0.0409<br>0.0611<br>0.4466            |
|                                                    | Female | 0.02 ± 0.002 | 0.01 ± 0.002 | 0.01 ± 0.002 | 0.02 ± 0.003 | Diet<br>Genotype                                       | 1.085<br>0.097                   | 0.3048<br>0.7577                      |

|                                                   |        |              |              |              |              |                        |                |                   |
|---------------------------------------------------|--------|--------------|--------------|--------------|--------------|------------------------|----------------|-------------------|
|                                                   |        |              |              |              |              | <b>Diet X genotype</b> | 14.51          | <b>0.0005</b>     |
| Hexadeacdieryl-<br>carnitine (C16:2)              | Male   | 0.02 ± 0.003 | 0.02 ± 0.002 | 0.02 ± 0.005 | 0.02 ± 0.003 | <b>Diet</b>            | 1.022          | 0.3189            |
|                                                   |        |              |              |              |              | <b>Genotype</b>        | 1.856          | 0.1816            |
|                                                   |        |              |              |              |              | <b>Diet X genotype</b> | 1.022          | 0.3189            |
|                                                   | Female | 0.02 ± 0.002 | 0.02 ± 0.003 | 0.02 ± 0.003 | 0.02 ± 0.003 | <b>Diet</b>            | 4.205<br>e-006 | 0.9984            |
|                                                   |        |              |              |              |              | <b>Genotype</b>        | 0.109          | 0.7433            |
|                                                   |        |              |              |              |              | <b>Diet X genotype</b> | 0.167          | 0.6857            |
| Hydroxyhexa-<br>decadienylcarnitine<br>(C16:2-OH) | Male   | 0.03 ± 0.003 | 0.02 ± 0.002 | 0.03 ± 0.005 | 0.02 ± 0.003 | <b>Diet</b>            | 0.577          | 0.8115            |
|                                                   |        |              |              |              |              | <b>Genotype</b>        | 0.657          | 0.4228            |
|                                                   |        |              |              |              |              | <b>Diet X genotype</b> | 0.004          | 0.9524            |
|                                                   | Female | 0.02 ± 0.003 | 0.02 ± 0.002 | 0.02 ± 0.004 | 0.03 ± 0.003 | <b>Diet</b>            | 0.959          | 0.3342            |
|                                                   |        |              |              |              |              | <b>Genotype</b>        | 0.420          | 0.5213            |
|                                                   |        |              |              |              |              | <b>Diet X genotype</b> | 1.243          | 0.2725            |
| Octadecanylecarnitine<br>(C18)                    | Male   | 0.04 ± 0.005 | 0.04 ± 0.002 | 0.1 ± 0.01   | 0.1 ± 0.01   | <b>Diet</b>            | 63.92          | <b>&lt;0.0001</b> |
|                                                   |        |              |              |              |              | <b>Genotype</b>        | 1.272          | 0.2669            |
|                                                   |        |              |              |              |              | <b>Diet X genotype</b> | 0.905          | 0.3478            |
|                                                   | Female | 0.05 ± 0.005 | 0.04 ± 0.004 | 0.07 ± 0.007 | 0.07 ± 0.006 | <b>Diet</b>            | 20.29          | <b>&lt;0.0001</b> |
|                                                   |        |              |              |              |              | <b>Genotype</b>        | 0.443          | 0.5100            |
|                                                   |        |              |              |              |              | <b>Diet X genotype</b> | 0.071          | 0.7912            |
| Octadecenoyl-<br>carnitine (C18:1)                | Male   | 0.1 ± 0.01   | 0.1 ± 0.008  | 0.2 ± 0.01   | 0.15 ± 0.01  | <b>Diet</b>            | 12.75          | <b>0.0010</b>     |
|                                                   |        |              |              |              |              | <b>Genotype</b>        | 0.575          | 0.4534            |
|                                                   |        |              |              |              |              | <b>Diet X genotype</b> | 0.890          | 0.3518            |
|                                                   | Female | 0.1 ± 0.01   | 0.1 ± 0.02   | 0.14 ± 0.01  | 0.12 ± 0.008 | <b>Diet</b>            | 5.322          | <b>0.0271</b>     |
|                                                   |        |              |              |              |              | <b>Genotype</b>        | 0.920          | 0.3441            |
|                                                   |        |              |              |              |              | <b>Diet X genotype</b> | 0.027          | 0.8644            |
| Hydroxyocta-<br>decenoylcarnitine<br>(C18:1-OH)   | Male   | 0.02 ± 0.003 | 0.02 ± 0.003 | 0.02 ± 0.003 | 0.02 ± 0.003 | <b>Diet</b>            | 0.873          | 0.3563            |
|                                                   |        |              |              |              |              | <b>Genotype</b>        | 0.013          | 0.9093            |
|                                                   |        |              |              |              |              | <b>Diet X genotype</b> | 0.293          | 0.5918            |
|                                                   | Female | 0.03 ± 0.003 | 0.02 ± 0.003 | 0.02 ± 0.003 | 0.02 ± 0.004 | <b>Diet</b>            | 0.501          | 0.4836            |
|                                                   |        |              |              |              |              | <b>Genotype</b>        | 0.025          | 0.8765            |
|                                                   |        |              |              |              |              | <b>Diet X genotype</b> | 0.036          | 0.8515            |
| Octadecadienyl-<br>carnitine (C18:2)              | Male   | 0.04 ± 0.007 | 0.04 ± 0.005 | 0.03 ± 0.002 | 0.03 ± 0.004 | <b>Diet</b>            | 7.872          | <b>0.0081</b>     |
|                                                   |        |              |              |              |              | <b>Genotype</b>        | 0.460          | 0.5021            |

|                     |        |               |              |                |              |                 |       |         |
|---------------------|--------|---------------|--------------|----------------|--------------|-----------------|-------|---------|
|                     | Female | 0.05 ± 0.006  | 0.04 ± 0.005 | 0.03 ± 0.003   | 0.02 ± 0.002 | Diet X genotype | 0.612 | 0.4392  |
|                     |        |               |              |                |              | Diet            | 24.26 | <0.0001 |
|                     |        |               |              |                |              | Genotype        | 3.216 | 0.0816  |
|                     |        |               |              |                |              | Diet X genotype | 0.712 | 0.4045  |
| <b>Amino acids</b>  |        |               |              |                |              |                 |       |         |
| Alanine (Ala)       | Male   | 334.6 ± 33.02 | 318.6 ± 24.1 | 358.8 ± 29.404 | 429.7 ± 30.5 | Diet            | 5.331 | 0.0270  |
|                     |        |               |              |                |              | Genotype        | 0.879 | 0.3550  |
|                     | Female | 268.7 ± 15.8  | 262.8 ± 7.1  | 334.2 ± 30.6   | 423.4 ± 31.8 | Diet X genotype | 2.195 | 0.1474  |
|                     |        |               |              |                |              | Diet            | 21.61 | <0.0001 |
| Arginine (Arg)      | Male   | 92.3 ± 18.6   | 118.2 ± 15.5 | 100.4 ± 11.0   | 170.6 ± 23.0 | Genotype        | 2.931 | 0.0957  |
|                     |        |               |              |                |              | Diet X genotype | 3.824 | 0.0585  |
|                     | Female | 86.9 ± 8.1    | 106.5 ± 8.7  | 68.1 ± 3.2     | 83.6 ± 5.1   | Diet            | 3.292 | 0.0796  |
|                     |        |               |              |                |              | Genotype        | 8.284 | 0.0073  |
| Asparagine (Asn)    | Male   | 116.4 ± 13.6  | 107.3 ± 10.5 | 129.8 ± 7.7    | 168.1 ± 16.7 | Diet X genotype | 1.756 | 0.1952  |
|                     |        |               |              |                |              | Diet            | 10.03 | 0.0032  |
|                     | Female | 101.0 ± 7.4   | 113.1 ± 6.8  | 106.7 ± 7.0    | 118.0 ± 11.5 | Genotype        | 7.111 | 0.0115  |
|                     |        |               |              |                |              | Diet X genotype | 0.102 | 0.7520  |
| Aspartic acid (Asp) | Male   | 82.1 ± 7.6    | 88.5 ± 10.7  | 75.1 ± 5.8     | 96.6 ± 11.8  | Diet            | 8.731 | 0.0056  |
|                     |        |               |              |                |              | Genotype        | 1.346 | 0.2538  |
|                     | Female | 66.7 ± 6.7    | 61.0 ± 3.8   | 74.8 ± 7.4     | 104.7 ± 15.6 | Diet X genotype | 3.553 | 0.0678  |
|                     |        |               |              |                |              | Diet            | 0.393 | 0.5347  |
| Citruline (Cit)     | Male   | 42.2 ± 3.7    | 47.2 ± 3.9   | 44.5 ± 6.0     | 51.5 ± 5.5   | Genotype        | 1.927 | 0.1738  |
|                     |        |               |              |                |              | Diet X genotype | 0.002 | 0.9630  |
|                     | Female | 53.6 ± 3.9    | 56.0 ± 4.1   | 45.4 ± 4.1     | 53.0 ± 3.1   | Diet            | 0.004 | 0.9503  |
|                     |        |               |              |                |              | Genotype        | 2.269 | 0.1412  |
|                     | Male   |               |              |                |              | Diet X genotype | 0.665 | 0.4205  |
|                     |        |               |              |                |              | Diet            | 6.609 | 0.0148  |
|                     | Female |               |              |                |              | Genotype        | 1.459 | 0.2356  |
|                     |        |               |              |                |              | Diet X genotype | 3.123 | 0.0864  |
|                     | Male   |               |              |                |              | Diet            | 0.446 | 0.5085  |
|                     |        |               |              |                |              | Genotype        | 1.472 | 0.2332  |
|                     | Female |               |              |                |              | Diet X genotype | 0.043 | 0.8367  |
|                     |        |               |              |                |              | Diet            | 2.165 | 0.1501  |
|                     | Male   |               |              |                |              | Genotype        | 1.721 | 0.1981  |
|                     |        |               |              |                |              |                 |       |         |

|                     |        |              |              |              |              |                 |       |        |
|---------------------|--------|--------------|--------------|--------------|--------------|-----------------|-------|--------|
|                     |        |              |              |              |              | Diet X genotype | 0.460 | 0.5023 |
| Glutamine (Gln)     | Male   | 608.8 ± 32.9 | 525.4 ± 21.3 | 494 ± 17.057 | 585.7 ± 28.7 | Diet            | 1.152 | 0.2904 |
|                     |        |              |              |              |              | Genotype        | 0.027 | 0.8707 |
|                     |        |              |              |              |              | Diet X genotype | 11.90 | 0.0015 |
|                     | Female | 549.4 ± 27.7 | 507.6 ± 29.8 | 581.1 ± 34.1 | 541.4 ± 22.5 | Diet            | 1.293 | 0.2633 |
|                     |        |              |              |              |              | Genotype        | 2.001 | 0.1660 |
|                     |        |              |              |              |              | Diet X genotype | 0.001 | 0.9705 |
| Glutamic acid (Glu) | Male   | 162.7 ± 37.2 | 219.3 ± 36.8 | 109.5 ± 26.8 | 113.1 ± 22.9 | Diet            | 6.638 | 0.0148 |
|                     |        |              |              |              |              | Genotype        | 0.946 | 0.3381 |
|                     |        |              |              |              |              | Diet X genotype | 0.736 | 0.3974 |
|                     | Female | 114.5 ± 35.2 | 41.8 ± 19.6  | 88.5 ± 29.3  | 36.8 ± 11.0  | Diet            | 0.350 | 0.5580 |
|                     |        |              |              |              |              | Genotype        | 5.600 | 0.0238 |
|                     |        |              |              |              |              | Diet X genotype | 0.161 | 0.6906 |
| Glycine (Gly)       | Male   | 273.2 ± 13.9 | 221.7 ± 10.6 | 193.5 ± 10.4 | 256 ± 16.8   | Diet            | 2.907 | 0.0973 |
|                     |        |              |              |              |              | Genotype        | 0.169 | 0.6836 |
|                     |        |              |              |              |              | Diet X genotype | 18.36 | 0.0001 |
|                     | Female | 210.4 ± 11.4 | 179.2 ± 5.5  | 181.8 ± 11.7 | 197 ± 11.2   | Diet            | 0.265 | 0.6099 |
|                     |        |              |              |              |              | Genotype        | 0.578 | 0.4523 |
|                     |        |              |              |              |              | Diet X genotype | 4.868 | 0.0340 |
| Histidine (His)     | Male   | 63.5 ± 5.4   | 56.3 ± 2.2   | 66.7 ± 2.9   | 85.1 ± 8.0   | Diet            | 9.230 | 0.0046 |
|                     |        |              |              |              |              | Genotype        | 1.139 | 0.2934 |
|                     |        |              |              |              |              | Diet X genotype | 5.916 | 0.0204 |
|                     | Female | 60.7 ± 3.8   | 61.2 ± 1.8   | 69.2 ± 4.1   | 72.8 ± 3.8   | Diet            | 7.876 | 0.0081 |
|                     |        |              |              |              |              | Genotype        | 0.325 | 0.5722 |
|                     |        |              |              |              |              | Diet X genotype | 0.189 | 0.6667 |
| Isoleucine (Ile)    | Male   | 84.0 ± 6.4   | 98.9 ± 8.7   | 115.1 ± 9.0  | 131.0 ± 12.8 | Diet            | 11.08 | 0.0020 |
|                     |        |              |              |              |              | Genotype        | 2.634 | 0.1133 |
|                     |        |              |              |              |              | Diet X genotype | 0.003 | 0.9574 |
|                     | Female | 86.1 ± 6.6   | 96.4 ± 5.4   | 82.0 ± 5.0   | 94.2 ± 13.6  | Diet            | 0.135 | 0.7160 |
|                     |        |              |              |              |              | Genotype        | 1.716 | 0.1988 |
|                     |        |              |              |              |              | Diet X genotype | 0.013 | 0.9098 |
| Leucine (Leu)       | Male   | 150.9 ± 22.8 | 160.1 ± 21.7 | 194 ± 12.4   | 237.6 ± 26.8 | Diet            | 8.005 | 0.0077 |
|                     |        |              |              |              |              | Genotype        | 1.532 | 0.2241 |
|                     |        |              |              |              |              | Diet X genotype | 0.652 | 0.4250 |

|                     |        |               |              |              |              |                                     |                         |                                       |
|---------------------|--------|---------------|--------------|--------------|--------------|-------------------------------------|-------------------------|---------------------------------------|
|                     | Female | 127.07 ± 12.3 | 138.7 ± 7.6  | 129.5 ± 8.5  | 152.7 ± 19.8 | Diet<br>Genotype<br>Diet X genotype | 0.386<br>1.734<br>0.194 | 0.5384<br>0.1965<br>0.6628            |
| Lysine (Lys)        | Male   | 296.3 ± 59.0  | 312.1 ± 62.4 | 364.7 ± 40.5 | 526.2 ± 75.3 | Diet<br>Genotype<br>Diet X genotype | 5.571<br>2.194<br>1.483 | <b>0.0240</b><br>0.1475<br>0.2314     |
|                     | Female | 233.3 ± 12.6  | 237.7 ± 9.4  | 322.2 ± 28.6 | 348.7 ± 27.1 | Diet<br>Genotype<br>Diet X genotype | 21.18<br>0.505<br>0.260 | <b>&lt;0.0001</b><br>0.4821<br>0.6137 |
| Methionine (Met)    | Male   | 80.6 ± 11.7   | 73.5 ± 9.3   | 87.9 ± 8.1   | 119.2 ± 14.8 | Diet<br>Genotype<br>Diet X genotype | 5.532<br>1.158<br>2.915 | <b>0.0243</b><br>0.2891<br>0.0964     |
|                     | Female | 69.5 ± 7.1    | 72.8 ± 3.4   | 70.5 ± 6.1   | 89.1 ± 7.0   | Diet<br>Genotype<br>Diet X genotype | 1.941<br>3.112<br>1.510 | 0.1724<br>0.0865<br>0.2273            |
| Ornithine (Orn)     | Male   | 55.1 ± 4.7    | 51.4 ± 4.3   | 41.6 ± 3.9   | 51.4 ± 3.9   | Diet<br>Genotype<br>Diet X genotype | 2.590<br>0.520<br>2.559 | 0.1163<br>0.4754<br>0.1184            |
|                     | Female | 35.5 ± 3.0    | 34.4 ± 2.6   | 41.8 ± 7.2   | 47.9 ± 8.9   | Diet<br>Genotype<br>Diet X genotype | 2.534<br>0.165<br>0.337 | 0.1204<br>0.6868<br>0.5653            |
| Phenylalanine (Phe) | Male   | 61.3 ± 5.6    | 63.7 ± 1.7   | 61.0 ± 2.6   | 90.5 ± 14.2  | Diet<br>Genotype<br>Diet X genotype | 2.774<br>4.022<br>2.896 | 0.1066<br>0.0527<br>0.0977            |
|                     | Female | 61.3 ± 5.6    | 63.7 ± 1.7   | 61.0 ± 2.6   | 65.9 ± 4.7   | Diet<br>Genotype<br>Diet X genotype | 0.048<br>0.821<br>0.095 | 0.8271<br>0.3710<br>0.7594            |
| Proline (Pro)       | Male   | 102.6 ± 15.3  | 90.7 ± 10.3  | 140.5 ± 16.6 | 172.4 ± 20.5 | Diet<br>Genotype<br>Diet X genotype | 13.84<br>0.387<br>1.858 | <b>0.0007</b><br>0.5376<br>0.1814     |
|                     | Female | 82.5 ± 11.1   | 89.3 ± 5.8   | 100.3 ± 11.2 | 129.5 ± 18.0 | Diet<br>Genotype<br>Diet X genotype | 5.334<br>2.040<br>0.798 | <b>0.0269</b><br>0.1621<br>0.3779     |
| Serine (Ser)        | Male   | 133.3 ± 19.04 | 130.0 ± 19.1 | 130.8 ± 7.3  | 201.7 ± 21.0 | Diet                                | 3.923                   | 0.0553                                |

|                        |        |              |              |              |              |                                                                    |                                           |                                                              |
|------------------------|--------|--------------|--------------|--------------|--------------|--------------------------------------------------------------------|-------------------------------------------|--------------------------------------------------------------|
|                        | Female | 128.5 ± 5.6  | 128.7 ± 6.6  | 142.1 ± 8.2  | 155.8 ± 11.7 | Genotype<br>Diet X genotype<br>Diet<br>Genotype<br>Diet X genotype | 3.739<br>4.510<br>5.769<br>0.679<br>0.632 | 0.0610<br><b>0.0406</b><br><b>0.0218</b><br>0.4156<br>0.4320 |
| Threonine (Thr)        | Male   | 145.9 ± 14.6 | 134.3 ± 14.4 | 204.1 ± 14.5 | 249.8 ± 24.6 | Diet<br>Genotype<br>Diet X genotype                                | 24.31<br>0.933<br>2.653                   | <b>&lt;0.0001</b><br>0.3407<br>0.1121                        |
|                        | Female | 139.9 ± 7.4  | 150.4 ± 8.9  | 174.3 ± 22.1 | 216.1 ± 14.0 | Diet<br>Genotype<br>Diet X genotype                                | 11.84<br>3.236<br>1.153                   | <b>0.0015</b><br>0.0807<br>0.2902                            |
| Tryptophane (Trp)      | Male   | 79.7 ± 2.8   | 80.2 ± 6.5   | 58.7 ± 6.0   | 76.9 ± 9.9   | Diet<br>Genotype<br>Diet X genotype                                | 3.052<br>1.777<br>1.604                   | 0.0894<br>0.1911<br>0.2137                                   |
|                        | Female | 103.2 ± 9.5  | 104.6 ± 6.0  | 75.8 ± 4.7   | 92.6 ± 6.4   | Diet<br>Genotype<br>Diet X genotype                                | 7.995<br>1.723<br>1.225                   | <b>0.0077</b><br>0.1979<br>0.2759                            |
| Tyrosine (Tyr)         | Male   | 73.8 ± 9.9   | 77.4 ± 7.8   | 100.1 ± 11.5 | 131.7 ± 19.2 | Diet<br>Genotype<br>Diet X genotype                                | 9.600<br>1.831<br>1.160                   | <b>0.0038</b><br>0.1847<br>0.2888                            |
|                        | Female | 72.0 ± 9.8   | 76.8 ± 3.5   | 82.7 ± 7.3   | 104.8 ± 8.5  | Diet<br>Genotype<br>Diet X genotype                                | 6.172<br>2.955<br>1.217                   | <b>0.0179</b><br>0.0944<br>0.2774                            |
| Valine (Val)           | Male   | 202.7 ± 10.5 | 217.3 ± 16.5 | 299.4 ± 18.6 | 321.1 ± 32.7 | Diet<br>Genotype<br>Diet X genotype                                | 21.39<br>0.702<br>0.027                   | <b>&lt;0.0001</b><br>0.4077<br>0.8715                        |
|                        | Female | 196.4 ± 15.8 | 215.4 ± 12.3 | 199.4 ± 14.3 | 238.3 ± 23.9 | Diet<br>Genotype<br>Diet X genotype                                | 0.554<br>2.784<br>0.327                   | 0.4615<br>0.1041<br>0.5711                                   |
| <b>Biogenic Amines</b> |        |              |              |              |              |                                                                    |                                           |                                                              |
| Dopamine               | Male   | 1.8 ± 0.3    | 1.6 ± 0.16   | 2.5 ± 0.4    | 3.3 ± 0.6    | Diet<br>Genotype<br>Diet X genotype                                | 8.301<br>0.471<br>1.913                   | <b>0.0068</b><br>0.4971<br>0.1756                            |
|                        | Female | 1.7 ± 0.2    | 3.1 ± 0.9    | 3.8 ± 0.7    | 3.1 ± 0.7    | Diet                                                               | 2.160                                     | 0.1517                                                       |

|            |        |              |              |              |              |                        |        |               |
|------------|--------|--------------|--------------|--------------|--------------|------------------------|--------|---------------|
|            |        |              |              |              |              | <b>Genotype</b>        | 0.224  | 0.6394        |
|            |        |              |              |              |              | <b>Diet X genotype</b> | 2.118  | 0.1556        |
| Carnosine  | Male   | 3.1 ± 0.4    | 2.6 ± 0.2    | 1.7 ± 0.2    | 1.8 ± 0.2    | <b>Diet</b>            | 18.14  | <b>0.0002</b> |
|            |        |              |              |              |              | <b>Genotype</b>        | 0.879  | 0.3550        |
|            |        |              |              |              |              | <b>Diet X genotype</b> | 1.368  | 0.2503        |
|            | Female | 1.3 ± 0.1    | 1.2 ± 0.1    | 1.4 ± 0.1    | 1.1 ± 0.07   | <b>Diet</b>            | 0.0001 | 0.9920        |
|            |        |              |              |              |              | <b>Genotype</b>        | 1.386  | 0.2486        |
|            |        |              |              |              |              | <b>Diet X genotype</b> | 0.523  | 0.4752        |
| Creatine   | Male   | 5.2 ± 0.6    | 4.4 ± 0.5    | 3.2 ± 0.5    | 3.8 ± 0.3    | <b>Diet</b>            | 7.041  | <b>0.0119</b> |
|            |        |              |              |              |              | <b>Genotype</b>        | 0.045  | 0.8329        |
|            |        |              |              |              |              | <b>Diet X genotype</b> | 1.764  | 0.1927        |
|            | Female | 4.7 ± 0.5    | 3.8 ± 0.4    | 4.6 ± 0.4    | 5.5 ± 0.3    | <b>Diet</b>            | 4.016  | 0.0529        |
|            |        |              |              |              |              | <b>Genotype</b>        | 0.026  | 0.8725        |
|            |        |              |              |              |              | <b>Diet X genotype</b> | 5.055  | 0.0310        |
| Histamine  | Male   | 1.1 ± 0.1    | 0.9 ± 0.05   | 0.8 ± 0.04   | 0.9 ± 0.09   | <b>Diet</b>            | 3.796  | 0.0594        |
|            |        |              |              |              |              | <b>Genotype</b>        | 0.079  | 0.7798        |
|            |        |              |              |              |              | <b>Diet X genotype</b> | 6.719  | <b>0.0138</b> |
|            | Female | 1.6 ± 0.1    | 1.4 ± 0.2    | 1.4 ± 0.1    | 1.2 ± 0.07   | <b>Diet</b>            | 3.644  | 0.0645        |
|            |        |              |              |              |              | <b>Genotype</b>        | 2.473  | 0.1248        |
|            |        |              |              |              |              | <b>Diet X genotype</b> | 0.008  | 0.9286        |
| Putrescine | Male   | 0.5 ± 0.09   | 0.5 ± 0.06   | 0.6 ± 0.07   | 0.7 ± 0.1    | <b>Diet</b>            | 3.205  | 0.0821        |
|            |        |              |              |              |              | <b>Genotype</b>        | 1.599  | 0.2144        |
|            |        |              |              |              |              | <b>Diet X genotype</b> | 0.129  | 0.7221        |
|            | Female | 0.4 ± 0.05   | 0.4 ± 0.04   | 0.5 ± 0.05   | 0.4 ± 0.03   | <b>Diet</b>            | 0.993  | 0.3258        |
|            |        |              |              |              |              | <b>Genotype</b>        | 1.045  | 0.3137        |
|            |        |              |              |              |              | <b>Diet X genotype</b> | 0.140  | 0.7108        |
| Spermidine | Male   | 0.03 ± 0.002 | 0.02 ± 0.001 | 0.03 ± 0.002 | 0.04 ± 0.005 | <b>Diet</b>            | 7.041  | <b>0.0120</b> |
|            |        |              |              |              |              | <b>Genotype</b>        | 5.588  | <b>0.0239</b> |
|            |        |              |              |              |              | <b>Diet X genotype</b> | 8.286  | <b>0.0069</b> |
|            | Female | 0.03 ± 0.003 | 0.03 ± 0.004 | 0.03 ± 0.002 | 0.03 ± 0.003 | <b>Diet</b>            | 0.149  | 0.7019        |
|            |        |              |              |              |              | <b>Genotype</b>        | 0.006  | 0.9371        |
|            |        |              |              |              |              | <b>Diet X genotype</b> | 1.448  | 0.2371        |
| Spermine   | Male   | 0.6 ± 0.07   | 0.5 ± 0.03   | 0.6 ± 0.04   | 0.8 ± 0.06   | <b>Diet</b>            | 6.525  | <b>0.0151</b> |
|            |        |              |              |              |              | <b>Genotype</b>        | 0.151  | 0.7002        |

|                                      |        |              |              |               |              |                 |       |                   |
|--------------------------------------|--------|--------------|--------------|---------------|--------------|-----------------|-------|-------------------|
|                                      | Female | 0.6 ± 0.04   | 0.5 ± 0.05   | 0.6 ± 0.06    | 0.6 ± 0.05   | Diet X genotype | 8.099 | <b>0.0074</b>     |
|                                      |        |              |              |               |              | Diet            | 0.166 | 0.6859            |
|                                      |        |              |              |               |              | Genotype        | 0.176 | 0.6772            |
|                                      |        |              |              |               |              | Diet X genotype | 0.661 | 0.4217            |
| Trans-4-Hydroxyproline (t4-OH-Pro)   | Male   | 11.3 ± 0.9   | 9.6 ± 0.9    | 11.5 ± 1.6    | 10.7 ± 1.3   | Diet            | 0.305 | 0.5844            |
|                                      |        |              |              |               |              | Genotype        | 1.213 | 0.2782            |
|                                      |        |              |              |               |              | Diet X genotype | 0.138 | 0.7123            |
|                                      | Female | 6.3 ± 0.4    | 5.8 ± 0.3    | 5.04 ± 0.4    | 5.2 ± 0.4    | Diet            | 5.380 | <b>0.0265</b>     |
|                                      |        |              |              |               |              | Genotype        | 0.154 | 0.6976            |
|                                      |        |              |              |               |              | Diet X genotype | 0.710 | 0.4053            |
| Taurine                              | Male   | 444.7 ± 26.2 | 403.2 ± 17.0 | 370.3 ± 16.5  | 428.6 ± 18.8 | Diet            | 1.498 | 0.2289            |
|                                      |        |              |              |               |              | Genotype        | 0.176 | 0.6772            |
|                                      |        |              |              |               |              | Diet X genotype | 6.215 | <b>0.0174</b>     |
|                                      | Female | 339.2 ± 15.4 | 303.2 ± 11.8 | 357.8 ± 11.0  | 349.1 ± 15.6 | Diet            | 5.512 | <b>0.0247</b>     |
|                                      |        |              |              |               |              | Genotype        | 2.647 | 0.1127            |
|                                      |        |              |              |               |              | Diet X genotype | 0.987 | 0.3274            |
| Kynurenine                           | Male   | 1.2 ± 0.1    | 1.02 ± 0.1   | 0.7 ± 0.09    | 1.02 ± 0.1   | Diet            | 4.638 | <b>0.0392</b>     |
|                                      |        |              |              |               |              | Genotype        | 0.729 | 0.3997            |
|                                      |        |              |              |               |              | Diet X genotype | 4.465 | <b>0.0427</b>     |
|                                      | Female | 1.6 ± 0.09   | 1.3 ± 0.1    | 1.03 ± 0.1    | 0.9 ± 0.1    | Diet            | 19.11 | <b>0.0001</b>     |
|                                      |        |              |              |               |              | Genotype        | 4.088 | 0.0514            |
|                                      |        |              |              |               |              | Diet X genotype | 0.350 | 0.5582            |
| <b>Glycerophospholipids</b>          |        |              |              |               |              |                 |       |                   |
| <i>Lysophosphatidylcholine acyls</i> |        |              |              |               |              |                 |       |                   |
| lysoPC a C14:0                       | Male   | 18.8 ± 1.2   | 22.2 ± 0.5   | 30.04 ± 1.8   | 31.01 ± 1.5  | Diet            | 55.79 | <b>&lt;0.0001</b> |
|                                      |        |              |              |               |              | Genotype        | 2.664 | 0.1114            |
|                                      |        |              |              |               |              | Diet X genotype | 0.830 | 0.3684            |
|                                      | Female | 14.8 ± 0.3   | 17.3 ± 0.5   | 30.0 ± 2.4    | 33.1 ± 2.2   | Diet            | 83.00 | <b>&lt;0.0001</b> |
|                                      |        |              |              |               |              | Genotype        | 2.705 | 0.1090            |
|                                      |        |              |              |               |              | Diet X genotype | 0.040 | 0.8420            |
| lysoPC a C16:0                       | Male   | 745.8 ± 86.8 | 779.1 ± 18.1 | 806.1 ± 105.0 | 751 ± 31.5   | Diet            | 0.052 | 0.8207            |
|                                      |        |              |              |               |              | Genotype        | 0.024 | 0.8779            |
|                                      |        |              |              |               |              | Diet X genotype | 0.393 | 0.5347            |
|                                      | Female | 487.8 ± 15.6 | 500.3 ± 14.6 | 584.5 ± 25.6  | 691.3 ± 47.4 | Diet            | 23.64 | <b>&lt;0.0001</b> |

|                |        |              |              |              |              |                        |       |                   |
|----------------|--------|--------------|--------------|--------------|--------------|------------------------|-------|-------------------|
|                |        |              |              |              |              | <b>Genotype</b>        | 4.067 | 0.0514            |
|                |        |              |              |              |              | <b>Diet X genotype</b> | 2.538 | 0.1201            |
| lysoPC a C16:1 | Male   | 40.5 ± 11.9  | 25.9 ± 1.8   | 15.7 ± 3.1   | 12.3 ± 1.3   | <b>Diet</b>            | 9.448 | <b>0.0040</b>     |
|                |        |              |              |              |              | <b>Genotype</b>        | 2.070 | 0.1589            |
|                |        |              |              |              |              | <b>Diet X genotype</b> | 0.807 | 0.3751            |
|                | Female | 11.1 ± 1.05  | 11.6 ± 0.9   | 13.2 ± 1.2   | 14.0 ± 1.1   | <b>Diet</b>            | 4.442 | <b>0.0423</b>     |
|                |        |              |              |              |              | <b>Genotype</b>        | 0.324 | 0.5726            |
|                |        |              |              |              |              | <b>Diet X genotype</b> | 0.012 | 0.9124            |
| lysoPC a C17:0 | Male   | 13.3 ± 1.1   | 11.7 ± 0.7   | 14.3 ± 2.0   | 13.8 ± 1.3   | <b>Dite</b>            | 1.403 | 0.2441            |
|                |        |              |              |              |              | <b>Genotype</b>        | 0.567 | 0.4570            |
|                |        |              |              |              |              | <b>Diet X genotype</b> | 0.183 | 0.6737            |
|                | Female | 10.6 ± 0.9   | 10.9 ± 0.9   | 10.3 ± 0.6   | 12.2 ± 0.9   | <b>Diet</b>            | 0.359 | 0.5527            |
|                |        |              |              |              |              | <b>Genotype</b>        | 1.664 | 0.2055            |
|                |        |              |              |              |              | <b>Diet X genotype</b> | 1.014 | 0.3209            |
| lysoPC a C18:0 | Male   | 67.1 ± 6.1   | 70.4 ± 2.2   | 124.4 ± 15.5 | 135.6 ± 13.5 | <b>Diet</b>            | 32.16 | <b>&lt;0.0001</b> |
|                |        |              |              |              |              | <b>Genotype</b>        | 0.444 | 0.5094            |
|                |        |              |              |              |              | <b>Diet X genotype</b> | 0.133 | 0.7176            |
|                | Female | 73.6 ± 4.6   | 74.9 ± 4.8   | 108.9 ± 5.8  | 131.1 ± 12.1 | <b>Diet</b>            | 36.15 | <b>&lt;0.0001</b> |
|                |        |              |              |              |              | <b>Genotype</b>        | 2.385 | 0.1315            |
|                |        |              |              |              |              | <b>Diet X genotype</b> | 1.885 | 0.1785            |
| lysoPC a C18:1 | Male   | 210.4 ± 19.5 | 203.2 ± 10.3 | 312.2 ± 42.4 | 283.7 ± 15.5 | <b>Diet</b>            | 13.17 | <b>0.0009</b>     |
|                |        |              |              |              |              | <b>Genotype</b>        | 0.505 | 0.4818            |
|                |        |              |              |              |              | <b>Diet X genotype</b> | 0.180 | 0.6740            |
|                | Female | 130.4 ± 11.4 | 142.9 ± 13.1 | 268.9 ± 22.2 | 311.2 ± 32.6 | <b>Diet</b>            | 48.73 | <b>&lt;0.0001</b> |
|                |        |              |              |              |              | <b>Genotype</b>        | 1.555 | 0.2207            |
|                |        |              |              |              |              | <b>Diet X genotype</b> | 0.460 | 0.5022            |
| lysoPC a C18:2 | Male   | 393 ± 44.7   | 444.3 ± 30.0 | 693.7 ± 78.4 | 650 ± 49.1   | <b>Diet</b>            | 21.93 | <b>&lt;0.0001</b> |
|                |        |              |              |              |              | <b>Genotype</b>        | 0.005 | 0.9444            |
|                |        |              |              |              |              | <b>Diet X genotype</b> | 0.772 | 0.3857            |
|                | Female | 288.2 ± 16.3 | 333.8 ± 24.4 | 561.5 ± 46.5 | 603.3 ± 64.8 | <b>Diet</b>            | 39.24 | <b>&lt;0.0001</b> |
|                |        |              |              |              |              | <b>Genotype</b>        | 1.017 | 0.3202            |
|                |        |              |              |              |              | <b>Diet X genotype</b> | 0.002 | 0.9655            |
| lysoPC a C20:3 | Male   | 43.6 ± 6.9   | 40.2 ± 3.1   | 57.4 ± 8.7   | 54.6 ± 4.6   | <b>Diet</b>            | 5.165 | <b>0.0293</b>     |
|                |        |              |              |              |              | <b>Genotype</b>        | 0.254 | 0.6177            |

|                |        |              |             |              |              |                                                        |                                   |                                                 |
|----------------|--------|--------------|-------------|--------------|--------------|--------------------------------------------------------|-----------------------------------|-------------------------------------------------|
|                | Female | 21.7 ± 1.8   | 23.6 ± 2.6  | 52.6 ± 4.3   | 54.5 ± 4.8   | Diet X genotype<br>Diet<br>Genotype<br>Diet X genotype | 0.003<br>71.97<br>0.273<br>0.0003 | 0.9570<br><b>&lt;0.0001</b><br>0.6046<br>0.9866 |
| lysoPC a C20:4 | Male   | 108.6 ± 15.6 | 110.9 ± 7.1 | 219.1 ± 35.3 | 179 ± 12.7   | Diet<br>Genotype<br>Diet X genotype                    | 18.72<br>0.843<br>1.053           | <b>0.0001</b><br>0.3647<br>0.3117               |
|                | Female | 131.05 ± 6.3 | 118.3 ± 9.6 | 292 ± 20.0   | 313.4 ± 35.6 | Diet<br>Genotype<br>Diet X genotype                    | 67.45<br>0.040<br>0.622           | <b>&lt;0.0001</b><br>0.8436<br>0.4357           |
| lysoPC a C24:0 | Male   | 3.2 ± 0.3    | 3.5 ± 0.2   | 5.05 ± 0.5   | 6.5 ± 0.9    | Diet<br>Genotype<br>Diet X genotype                    | 21.08<br>2.787<br>1.192           | <b>&lt;0.0001</b><br>0.1037<br>0.2823           |
|                | Female | 4.2 ± 0.6    | 2.8 ± 0.3   | 4.9 ± 0.4    | 5.2 ± 0.4    | Diet<br>Genotype<br>Diet X genotype                    | 13.27<br>1.724<br>4.178           | <b>0.0009</b><br>0.1977<br><b>0.0485</b>        |
| lysoPC a C26:0 | Male   | 2.7 ± 0.5    | 2.6 ± 0.3   | 4.0 ± 0.5    | 5.5 ± 1.0    | Diet<br>Genotype<br>Diet X genotype                    | 10.48<br>1.234<br>1.600           | <b>0.0026</b><br>0.2739<br>0.2140               |
|                | Female | 3.3 ± 0.5    | 1.8 ± 0.3   | 3.4 ± 0.4    | 3.4 ± 0.5    | Diet<br>Genotype<br>Diet X genotype                    | 3.686<br>3.153<br>3.324           | 0.0630<br>0.0845<br>0.0768                      |
| lysoPC a C26:1 | Male   | 1.0 ± 0.2    | 0.9 ± 0.09  | 1.4 ± 0.1    | 1.8 ± 0.3    | Diet<br>Genotype<br>Diet X genotype                    | 12.66<br>1.225<br>2.246           | <b>0.0011</b><br>0.2758<br>0.1427               |
|                | Female | 1.5 ± 0.2    | 0.7 ± 0.1   | 1.5 ± 0.17   | 1.6 ± 0.3    | Diet<br>Genotype<br>Diet X genotype                    | 4.152<br>3.358<br>4.722           | <b>0.0492</b><br>0.0754<br><b>0.0366</b>        |
| lysoPC a C28:0 | Male   | 1.3 ± 0.1    | 1.1 ± 0.1   | 2.2 ± 0.3    | 3.1 ± 0.6    | Diet<br>Genotype<br>Diet X genotype                    | 19.83<br>1.090<br>2.829           | <b>&lt;0.0001</b><br>0.3034<br>0.1012           |
|                | Female | 2.0 ± 0.3    | 1.0 ± 0.1   | 2.0 ± 0.2    | 2.3 ± 0.3    | Diet<br>Genotype<br>Diet X genotype                    | 6.531<br>1.354<br>6.138           | <b>0.0151</b><br>0.2525<br><b>0.0182</b>        |

|                                    |        |            |            |            |             |                 |        |                   |
|------------------------------------|--------|------------|------------|------------|-------------|-----------------|--------|-------------------|
| lysoPC a C28:1                     | Male   | 1.0 ± 0.17 | 1.04 ± 0.1 | 1.7 ± 0.2  | 2.2 ± 0.3   | Diet            | 16.96  | <b>0.0002</b>     |
|                                    |        |            |            |            |             | Genotype        | 1.409  | 0.2431            |
|                                    |        |            |            |            |             | Diet X genotype | 0.773  | 0.3851            |
|                                    | Female | 1.5 ± 0.2  | 0.7 ± 0.1  | 1.7 ± 0.2  | 1.7 ± 0.2   | Diet            | 7.463  | <b>0.0098</b>     |
|                                    |        |            |            |            |             | Genotype        | 3.802  | 0.0592            |
|                                    |        |            |            |            |             | Diet X genotype | 2.747  | 0.1064            |
| <i>Phosphatidylcholine diacyls</i> |        |            |            |            |             |                 |        |                   |
| PC aa C24:0                        | Male   | 0.2 ± 0.05 | 0.2 ± 0.03 | 0.3 ± 0.04 | 0.4 ± 0.06  | Diet            | 10.72  | <b>0.0024</b>     |
|                                    |        |            |            |            |             | Genotype        | 0.010  | 0.9209            |
|                                    |        |            |            |            |             | Diet X genotype | 0.978  | 0.3293            |
|                                    | Female | 0.5 ± 0.1  | 0.2 ± 0.04 | 0.5 ± 0.06 | 0.5 ± 0.05  | Diet            | 6.823  | <b>0.0132</b>     |
|                                    |        |            |            |            |             | Genotype        | 6.983  | <b>0.0122</b>     |
|                                    |        |            |            |            |             | Diet X genotype | 1.695  | 0.2015            |
| PC aa C26:0                        | Male   | 1.9 ± 0.5  | 1.9 ± 0.2  | 2.4 ± 0.2  | 2.9 ± 0.6   | Diet            | 3.323  | 0.0769            |
|                                    |        |            |            |            |             | Genotype        | 0.258  | 0.6148            |
|                                    |        |            |            |            |             | Diet X genotype | 0.698  | 0.4093            |
|                                    | Female | 2.3 ± 0.3  | 1.3 ± 0.2  | 2.07 ± 0.3 | 2.05 ± 0.23 | Diet            | 0.987  | 0.3274            |
|                                    |        |            |            |            |             | Genotype        | 3.517  | 0.0691            |
|                                    |        |            |            |            |             | Diet X genotype | 3.198  | 0.0824            |
| PC aa C28:1                        | Male   | 0.5 ± 0.09 | 0.4 ± 0.04 | 0.7 ± 0.07 | 0.9 ± 0.1   | Diet            | 21.58  | <b>&lt;0.0001</b> |
|                                    |        |            |            |            |             | Genotype        | 0.821  | 0.3712            |
|                                    |        |            |            |            |             | Diet X genotype | 1.937  | 0.1727            |
|                                    | Female | 0.6 ± 0.07 | 0.3 ± 0.04 | 0.8 ± 0.07 | 0.8 ± 0.09  | Diet            | 22.99  | <b>&lt;0.0001</b> |
|                                    |        |            |            |            |             | Genotype        | 3.961  | 0.0544            |
|                                    |        |            |            |            |             | Diet X genotype | 2.069  | 0.1592            |
| PC aa C30:0                        | Male   | 1.6 ± 0.5  | 1.3 ± 0.2  | 1.1 ± 0.1  | 1.8 ± 0.2   | Diet            | 0.0002 | 0.9902            |
|                                    |        |            |            |            |             | Genotype        | 0.342  | 0.5622            |
|                                    |        |            |            |            |             | Diet X genotype | 2.463  | 0.1253            |
|                                    | Female | 1.0 ± 0.1  | 1.0 ± 0.1  | 1.6 ± 0.2  | 1.8 ± 0.3   | Diet            | 12.58  | <b>0.0011</b>     |
|                                    |        |            |            |            |             | Genotype        | 0.140  | 0.7103            |
|                                    |        |            |            |            |             | Diet X genotype | 0.077  | 0.7825            |
| PC aa C30:2                        | Male   | 0.2 ± 0.07 | 0.1 ± 0.03 | 0.2 ± 0.04 | 0.2 ± 0.05  | Diet            | 0.250  | 0.6208            |
|                                    |        |            |            |            |             | Genotype        | 0.104  | 0.7491            |
|                                    |        |            |            |            |             | Diet X genotype | 2.179  | 0.1500            |

|             |        |             |              |              |              |                                     |                         |                                          |
|-------------|--------|-------------|--------------|--------------|--------------|-------------------------------------|-------------------------|------------------------------------------|
|             | Female | 0.1 ± 0.02  | 0.1 ± 0.04   | 0.2 ± 0.03   | 0.2 ± 0.03   | Diet<br>Genotype<br>Diet X genotype | 5.992<br>0.096<br>1.152 | <b>0.0207</b><br>0.7591<br>0.2919        |
| PC aa C32:0 | Male   | 17.02 ± 1.3 | 18.8 ± 2.1   | 14.8 ± 1.4   | 23.4 ± 2.8   | Diet<br>Genotype<br>Diet X genotype | 0.365<br>6.485<br>2.866 | 0.5495<br><b>0.0154</b><br>0.0994        |
|             | Female | 16.3 ± 1.6  | 17.4 ± 1.7   | 21.7 ± 2.6   | 23.7 ± 2.9   | Diet<br>Genotype<br>Diet X genotype | 6.384<br>0.420<br>0.039 | <b>0.0162</b><br>0.5213<br>0.8443        |
| PC aa C32:1 | Male   | 11.04 ± 1.2 | 12.4 ± 1.5   | 7.6 ± 1.0    | 10.04 ± 1.2  | Dite<br>Genotype<br>Diet X genotype | 5.506<br>2.378<br>0.184 | <b>0.0247</b><br>0.1320<br>0.6710        |
|             | Female | 5.2 ± 0.7   | 5.7 ± 0.8    | 7.5 ± 1.2    | 8.3 ± 1.7    | Diet<br>Genotype<br>Diet X genotype | 4.025<br>0.319<br>0.017 | 0.0526<br>0.5757<br>0.8970               |
| PC aa C32:2 | Male   | 1.4 ± 0.09  | 1.4 ± 0.1    | 0.9 ± 0.1    | 0.9 ± 0.07   | Diet<br>Genotype<br>Diet X genotype | 20.05<br>0.023<br>0.008 | <b>&lt;0.0001</b><br>0.8807<br>0.9285    |
|             | Female | 0.6 ± 0.05  | 0.6 ± 0.05   | 0.8 ± 0.07   | 0.7 ± 0.07   | Diet<br>Genotype<br>Diet X genotype | 7.650<br>0.338<br>2.289 | <b>0.0090</b><br>0.5645<br>0.1392        |
| PC aa C32:3 | Male   | 0.17 ± 0.02 | 0.14 ± 0.01  | 0.17 ± 0.02  | 0.2 ± 0.02   | Diet<br>Genotype<br>Diet X genotype | 4.917<br>0.354<br>5.007 | <b>0.0332</b><br>0.5557<br><b>0.0317</b> |
|             | Female | 0.15 ± 0.02 | 0.13 ± 0.01  | 0.2 ± 0.02   | 0.19 ± 0.02  | Diet<br>Genotype<br>Diet X genotype | 8.464<br>0.906<br>0.423 | <b>0.0063</b><br>0.3478<br>0.5197        |
| PC aa C34:1 | Male   | 206.6 ± 8.0 | 219.4 ± 15.5 | 259.1 ± 19.4 | 277.7 ± 7.5  | Diet<br>Genotype<br>Diet X genotype | 16.01<br>1.288<br>0.043 | <b>0.0003</b><br>0.2641<br>0.8366        |
|             | Female | 83 ± 8.2    | 105.7 ± 7.8  | 175.7 ± 12.8 | 187.6 ± 12.0 | Diet<br>Genotype<br>Diet X genotype | 68.10<br>2.668<br>0.259 | <b>&lt;0.0001</b><br>0.1113<br>0.6141    |

|             |        |               |              |                |              |                 |       |         |
|-------------|--------|---------------|--------------|----------------|--------------|-----------------|-------|---------|
| PC aa C34:2 | Male   | 339 ± 14.7    | 404.6 ± 24.3 | 445.1 ± 28.018 | 513.5 ± 26.2 | Diet            | 19.55 | <0.0001 |
|             |        |               |              |                |              | Genotype        | 7.594 | 0.0092  |
|             |        |               |              |                |              | Diet X genotype | 0.003 | 0.9544  |
|             | Female | 171.4 ± 14.5  | 204.3 ± 8.02 | 288.9 ± 30.5   | 278.8 ± 16.4 | Diet            | 23.87 | <0.0001 |
|             |        |               |              |                |              | Genotype        | 0.338 | 0.5648  |
|             |        |               |              |                |              | Diet X genotype | 1.200 | 0.2809  |
| PC aa C34:3 | Male   | 12.7 ± 0.7    | 13.6 ± 0.9   | 10.5 ± 1.01    | 10.9 ± 0.5   | Diet            | 9.956 | 0.0032  |
|             |        |               |              |                |              | Genotype        | 0.765 | 0.3875  |
|             |        |               |              |                |              | Diet X genotype | 0.076 | 0.7839  |
|             | Female | 4.8 ± 0.3     | 5.1 ± 0.3    | 6.6 ± 0.7      | 5.7 ± 0.4    | Diet            | 5.933 | 0.0201  |
|             |        |               |              |                |              | Genotype        | 0.367 | 0.5488  |
|             |        |               |              |                |              | Diet X genotype | 1.858 | 0.1815  |
| PC aa C34:4 | Male   | 0.4 ± 0.03    | 0.5 ± 0.05   | 0.5 ± 0.08     | 0.5 ± 0.03   | Diet            | 1.063 | 0.3095  |
|             |        |               |              |                |              | Genotype        | 0.050 | 0.8241  |
|             |        |               |              |                |              | Diet X genotype | 2.109 | 0.1554  |
|             | Female | 0.2 ± 0.02    | 0.2 ± 0.03   | 0.4 ± 0.04     | 0.3 ± 0.03   | Diet            | 20.24 | <0.0001 |
|             |        |               |              |                |              | Genotype        | 0.968 | 0.3319  |
|             |        |               |              |                |              | Diet X genotype | 0.056 | 0.8143  |
| PC aa C36:0 | Male   | 2.4 ± 0.1     | 2.6 ± 0.2    | 4.5 ± 0.3      | 5.0 ± 0.3    | Diet            | 88.85 | <0.0001 |
|             |        |               |              |                |              | Genotype        | 2.265 | 0.1413  |
|             |        |               |              |                |              | Diet X genotype | 0.213 | 0.6472  |
|             | Female | 2.04 ± 0.2    | 2.1 ± 0.1    | 4.7 ± 0.5      | 4.2 ± 0.4    | Diet            | 45.44 | <0.0001 |
|             |        |               |              |                |              | Genotype        | 0.338 | 0.5647  |
|             |        |               |              |                |              | Diet X genotype | 0.667 | 0.4196  |
| PC aa C36:1 | Male   | 19.4 ± 1.04   | 21.4 ± 1.7   | 65.2 ± 3.8     | 75.7 ± 4.5   | Diet            | 246.5 | <0.0001 |
|             |        |               |              |                |              | Genotype        | 3.865 | 0.0573  |
|             |        |               |              |                |              | Diet X genotype | 1.799 | 0.1885  |
|             | Female | 13.5 ± 1.1    | 16.3 ± 1.7   | 46.3 ± 4.6     | 48.7 ± 3.8   | Diet            | 102.2 | <0.0001 |
|             |        |               |              |                |              | Genotype        | 0.663 | 0.4210  |
|             |        |               |              |                |              | Diet X genotype | 0.003 | 0.9571  |
| PC aa C36:2 | Male   | 174 ± 9.5     | 206.8 ± 10.7 | 400.6 ± 23.9   | 474.5 ± 27.6 | Diet            | 151.9 | <0.0001 |
|             |        |               |              |                |              | Genotype        | 7.079 | 0.0117  |
|             |        |               |              |                |              | Diet X genotype | 1.050 | 0.3125  |
|             | Female | 133.04 ± 13.8 | 162.7 ± 13.9 | 300.2 ± 27.7   | 314.7 ± 30.0 | Diet            | 47.86 | <0.0001 |

|             |        |              |             |              |              |                        |        |         |
|-------------|--------|--------------|-------------|--------------|--------------|------------------------|--------|---------|
|             |        |              |             |              |              | <b>Genotype</b>        | 0.916  | 0.3450  |
|             |        |              |             |              |              | <b>Diet X genotype</b> | 0.108  | 0.7444  |
| PC aa C36:3 | Male   | 86.6 ± 6.8   | 90.7 ± 4.9  | 93.5 ± 6.8   | 106.4 ± 4.4  | <b>Diet</b>            | 3.873  | 0.0570  |
|             |        |              |             |              |              | <b>Genotype</b>        | 2.165  | 0.1501  |
|             |        |              |             |              |              | <b>Diet X genotype</b> | 0.570  | 0.4553  |
|             | Female | 40.5 ± 4.2   | 50.5 ± 4.8  | 70.9 ± 6.4   | 71.1 ± 5.4   | <b>Diet</b>            | 23.35  | <0.0001 |
|             |        |              |             |              |              | <b>Genotype</b>        | 0.933  | 0.3407  |
|             |        |              |             |              |              | <b>Diet X genotype</b> | 0.861  | 0.3598  |
| PC aa C36:4 | Male   | 124.8 ± 5.5  | 135.2 ± 5.7 | 181.7 ± 18.1 | 187.5 ± 6.6  | <b>Diet</b>            | 26.24  | <0.0001 |
|             |        |              |             |              |              | <b>Genotype</b>        | 0.575  | 0.4532  |
|             |        |              |             |              |              | <b>Diet X genotype</b> | 0.046  | 0.8308  |
|             | Female | 88.9 ± 7.1   | 91.1 ± 7.07 | 169.1 ± 12.6 | 172.1 ± 13.8 | <b>Diet</b>            | 56.28  | <0.0001 |
|             |        |              |             |              |              | <b>Genotype</b>        | 0.060  | 0.8076  |
|             |        |              |             |              |              | <b>Diet X genotype</b> | 0.001  | 0.9732  |
| PC aa C36:5 | Male   | 7.5 ± 0.5    | 9.4 ± 1.0   | 5.6 ± 0.7    | 6.2 ± 0.4    | <b>Diet</b>            | 12.81  | 0.0010  |
|             |        |              |             |              |              | <b>Genotype</b>        | 3.109  | 0.0866  |
|             |        |              |             |              |              | <b>Diet X genotype</b> | 0.938  | 0.3394  |
|             | Female | 3.8 ± 0.4    | 4.2 ± 0.3   | 4.8 ± 0.4    | 4.2 ± 0.4    | <b>Diet</b>            | 1.830  | 0.1848  |
|             |        |              |             |              |              | <b>Genotype</b>        | 0.093  | 0.7617  |
|             |        |              |             |              |              | <b>Diet X genotype</b> | 1.485  | 0.2312  |
| PC aa C36:6 | Male   | 0.3 ± 0.04   | 0.3 ± 0.03  | 0.3 ± 0.04   | 0.3 ± 0.02   | <b>Diet</b>            | 0.527  | 0.4729  |
|             |        |              |             |              |              | <b>Genotype</b>        | 0.699  | 0.4088  |
|             |        |              |             |              |              | <b>Diet X genotype</b> | 0.026  | 0.8730  |
|             | Female | 0.13 ± 0.015 | 0.12 ± 0.03 | 0.2 ± 0.02   | 0.2 ± 0.03   | <b>Diet</b>            | 12.56  | 0.0011  |
|             |        |              |             |              |              | <b>Genotype</b>        | 0.107  | 0.7461  |
|             |        |              |             |              |              | <b>Diet X genotype</b> | 0.0003 | 0.9873  |
| PC aa C38:0 | Male   | 1.4 ± 0.1    | 1.5 ± 0.1   | 2.5 ± 0.19   | 3.3 ± 0.3    | <b>Diet</b>            | 62.14  | <0.0001 |
|             |        |              |             |              |              | <b>Genotype</b>        | 5.796  | 0.0215  |
|             |        |              |             |              |              | <b>Diet X genotype</b> | 4.678  | 0.0375  |
|             | Female | 1.3 ± 0.09   | 1.1 ± 0.1   | 2.8 ± 0.2    | 2.7 ± 0.2    | <b>Diet</b>            | 82.96  | <0.0001 |
|             |        |              |             |              |              | <b>Genotype</b>        | 0.456  | 0.5041  |
|             |        |              |             |              |              | <b>Diet X genotype</b> | 0.062  | 0.8045  |
| PC aa C38:1 | Male   | 1.05 ± 0.17  | 1.02 ± 0.07 | 1.7 ± 0.2    | 2.5 ± 0.4    | <b>Diet</b>            | 21.15  | <0.0001 |
|             |        |              |             |              |              | <b>Genotype</b>        | 2.541  | 0.1199  |

|             |        |             |             |              |              |                                                        |                                  |                                                 |
|-------------|--------|-------------|-------------|--------------|--------------|--------------------------------------------------------|----------------------------------|-------------------------------------------------|
|             | Female | 0.9 ± 0.1   | 0.6 ± 0.1   | 1.5 ± 0.1    | 1.6 ± 0.1    | Diet X genotype<br>Diet<br>Genotype<br>Diet X genotype | 3.037<br>38.17<br>0.578<br>2.429 | 0.0902<br><b>&lt;0.0001</b><br>0.4521<br>0.1281 |
| PC aa C38:3 | Male   | 20.0 ± 1.5  | 21.9 ± 1.2  | 27.0 ± 2.2   | 30.8 ± 1.9   | Diet<br>Genotype<br>Diet X genotype                    | 20.75<br>2.744<br>0.308          | <b>&lt;0.0001</b><br>0.1066<br>0.5824           |
|             | Female | 12.3 ± 1.03 | 15.4 ± 1.5  | 23.6 ± 1.7   | 24.2 ± 1.9   | Diet<br>Genotype<br>Diet X genotype                    | 40.60<br>1.391<br>0.657          | <b>&lt;0.0001</b><br>0.2463<br>0.4230           |
| PC aa C38:4 | Male   | 54.7 ± 4.2  | 58.7 ± 2.8  | 117.9 ± 12.3 | 120.3 ± 8.7  | Diet<br>Genotype<br>Diet X genotype                    | 59.08<br>0.154<br>0.009          | <b>&lt;0.0001</b><br>0.6973<br>0.9235           |
|             | Female | 72.9 ± 6.9  | 71.9 ± 7.04 | 145.3 ± 8.4  | 156.7 ± 17.9 | Diet<br>Genotype<br>Diet X genotype                    | 48.89<br>0.216<br>0.304          | <b>&lt;0.0001</b><br>0.6452<br>0.5852           |
| PC aa C38:5 | Male   | 32.2 ± 2.06 | 31.3 ± 1.5  | 33.04 ± 3.9  | 32.0 ± 1.8   | Diet<br>Genotype<br>Diet X genotype                    | 0.091<br>0.145<br>0.001          | 0.7648<br>0.7060<br>0.9716                      |
|             | Female | 20.7 ± 1.7  | 21.3 ± 2.4  | 35.1 ± 2.4   | 35.08 ± 3.9  | Diet<br>Genotype<br>Diet X genotype                    | 26.42<br>0.008<br>0.012          | <b>&lt;0.0001</b><br>0.9280<br>0.9136           |
| PC aa C38:6 | Male   | 86.0 ± 3.6  | 80.6 ± 3.07 | 95.3 ± 10.07 | 97.4 ± 5.3   | Diet<br>Genotype<br>Diet X genotype                    | 4.304<br>0.071<br>0.358          | <b>0.0454</b><br>0.7917<br>0.5535               |
|             | Female | 49.1 ± 3.2  | 48.6 ± 4.6  | 92.2 ± 6.3   | 95.2 ± 7.09  | Diet<br>Genotype<br>Diet X genotype                    | 65.30<br>0.049<br>0.101          | <b>&lt;0.0001</b><br>0.8255<br>0.7522           |
| PC aa C40:2 | Male   | 0.6 ± 0.03  | 0.6 ± 0.05  | 0.8 ± 0.05   | 0.9 ± 0.07   | Diet<br>Genotype<br>Diet X genotype                    | 15.17<br>3.131<br>2.085          | <b>0.0004</b><br>0.0855<br>0.1577               |
|             | Female | 0.5 ± 0.05  | 0.4 ± 0.04  | 0.7 ± 0.06   | 0.7 ± 0.07   | Diet<br>Genotype<br>Diet X genotype                    | 24.47<br>0.164<br>0.469          | <b>&lt;0.0001</b><br>0.6879<br>0.4978           |

|             |        |             |            |            |             |                                                                    |                                                |                                                              |
|-------------|--------|-------------|------------|------------|-------------|--------------------------------------------------------------------|------------------------------------------------|--------------------------------------------------------------|
| PC aa C40:3 | Male   | 1.03 ± 0.06 | 0.8 ± 0.06 | 0.9 ± 0.06 | 0.9 ± 0.05  | Diet                                                               | 0.316                                          | 0.5777                                                       |
|             | Female | 0.4 ± 0.03  | 0.4 ± 0.04 | 0.6 ± 0.02 | 0.5 ± 0.04  | Genotype<br>Diet X genotype<br>Diet<br>Genotype<br>Diet X genotype | 5.722<br>2.050<br>16.17<br>0.494<br>0.696      | <b>0.0223</b><br>0.1610<br><b>0.0003</b><br>0.4870<br>0.4097 |
| PC aa C40:4 | Male   | 2.02 ± 0.3  | 2.0 ± 0.2  | 3.2 ± 0.2  | 3.2 ± 0.2   | Diet                                                               | 34.77                                          | <b>&lt;0.0001</b>                                            |
|             | Female | 1.04 ± 0.07 | 1.2 ± 0.1  | 1.6 ± 0.1  | 1.6 ± 0.1   | Genotype<br>Diet X genotype<br>Diet<br>Genotype<br>Diet X genotype | 3.007e-005<br>0.053<br>22.86<br>0.772<br>0.150 | 0.9957<br>0.8195<br><b>&lt;0.0001</b><br>0.3857<br>0.7012    |
| PC aa C40:5 | Male   | 3.8 ± 0.5   | 4.02 ± 0.3 | 5.4 ± 0.5  | 4.8 ± 0.4   | Diet                                                               | 8.640                                          | <b>0.0057</b>                                                |
|             | Female | 2.3 ± 0.1   | 2.5 ± 0.1  | 4.07 ± 0.4 | 4.004 ± 0.3 | Genotype<br>Diet X genotype<br>Diet<br>Genotype<br>Diet X genotype | 0.266<br>1.083<br>43.60<br>0.066<br>0.265      | 0.6094<br>0.3049<br><b>&lt;0.0001</b><br>0.7994<br>0.6098    |
| PC aa C40:6 | Male   | 21.09 ± 0.9 | 21.6 ± 0.9 | 29.5 ± 2.3 | 32.7 ± 2.2  | Diet                                                               | 31.12                                          | <b>&lt;0.0001</b>                                            |
|             | Female | 21.7 ± 2.2  | 21.8 ± 2.1 | 36.5 ± 2.2 | 39.3 ± 3.5  | Genotype<br>Diet X genotype<br>Diet<br>Genotype<br>Diet X genotype | 1.117<br>0.631<br>39.40<br>0.313<br>0.292      | 0.2979<br>0.4325<br><b>&lt;0.0001</b><br>0.5794<br>0.5923    |
| PC aa C42:0 | Male   | 0.2 ± 0.01  | 0.2 ± 0.02 | 0.3 ± 0.04 | 0.3 ± 0.03  | Diet                                                               | 29.21                                          | <b>&lt;0.0001</b>                                            |
|             | Female | 0.2 ± 0.02  | 0.2 ± 0.02 | 0.4 ± 0.04 | 0.4 ± 0.04  | Genotype<br>Diet X genotype<br>Diet<br>Genotype<br>Diet X genotype | 1.136<br>0.778<br>28.88<br>0.969<br>0.951      | 0.2935<br>0.3836<br><b>&lt;0.0001</b><br>0.3318<br>0.3362    |
| PC aa C42:1 | Male   | 0.2 ± 0.03  | 0.2 ± 0.02 | 0.2 ± 0.02 | 0.3 ± 0.02  | Diet                                                               | 2.443                                          | 0.1271                                                       |
|             |        |             |            |            |             | Genotype<br>Diet X genotype                                        | 0.014<br>3429                                  | 0.9081<br>0.0725                                             |

|                                       |        |            |             |            |            |                                     |                              |                                       |
|---------------------------------------|--------|------------|-------------|------------|------------|-------------------------------------|------------------------------|---------------------------------------|
|                                       | Female | 0.2 ± 0.3  | 0.2 ± 0.02  | 0.3 ± 0.03 | 0.3 ± 0.03 | Diet<br>Genotype<br>Diet X genotype | 10.76<br>1.962<br>0.3095     | <b>0.0024</b><br>0.1701<br>0.5816     |
| PC aa C42:2                           | Male   | 0.4 ± 0.03 | 0.4 ± 0.02  | 0.4 ± 0.03 | 0.5 ± 0.03 | Diet<br>Genotype<br>Diet X genotype | 0.923<br>1.089<br>1.672      | 0.3431<br>0.3036<br>0.2043            |
|                                       | Female | 0.3 ± 0.01 | 0.3 ± 0.04  | 0.4 ± 0.05 | 0.4 ± 0.02 | Diet<br>Genotype<br>Diet X genotype | 6.061<br>0.043<br>8.631e-005 | <b>0.0189</b><br>0.8368<br>0.9926     |
| PC aa C42:4                           | Male   | 0.2 ± 0.02 | 0.2 ± 0.02  | 0.3 ± 0.04 | 0.4 ± 0.02 | Diet<br>Genotype<br>Diet X genotype | 13.61<br>0.008<br>0.112      | <b>0.0007</b><br>0.9301<br>0.7395     |
|                                       | Female | 0.2 ± 0.01 | 0.2 ± 0.02  | 0.3 ± 0.02 | 0.3 ± 0.03 | Diet<br>Genotype<br>Diet X genotype | 28.29<br>1.589<br>0.188      | <b>&lt;0.0001</b><br>0.2158<br>0.6674 |
| PC aa C42:5                           | Male   | 0.4 ± 0.05 | 0.4 ± 0.03  | 0.5 ± 0.04 | 0.4 ± 0.04 | Diet<br>Genotype<br>Diet X genotype | 0.106<br>1.328<br>0.048      | 0.7467<br>0.2568<br>0.8278            |
|                                       | Female | 0.3 ± 0.02 | 0.2 ± 0.03  | 0.3 ± 0.03 | 0.3 ± 0.03 | Diet<br>Genotype<br>Diet X genotype | 0.535<br>0.545<br>2.124      | 0.4695<br>0.4653<br>0.1539            |
| PC aa C42:6                           | Male   | 0.7 ± 0.08 | 0.6 ± 0.04  | 0.7 ± 0.04 | 0.9 ± 0.07 | Diet<br>Genotype<br>Diet X genotype | 9.292<br>0.288<br>2.774      | <b>0.0043</b><br>0.5948<br>0.1045     |
|                                       | Female | 0.2 ± 0.02 | 0.2 ± 0.03  | 0.3 ± 0.03 | 0.3 ± 0.03 | Diet<br>Genotype<br>Diet X genotype | 5.891<br>0.087<br>0.148      | <b>0.0207</b><br>0.7695<br>0.7029     |
| <i>Phosphatidycholine acyl-alkyls</i> |        |            |             |            |            |                                     |                              |                                       |
| PC ae C30:0                           | Male   | 0.2 ± 0.03 | 0.2 ± 0.02  | 0.3 ± 0.03 | 0.3 ± 0.02 | Diet<br>Genotype<br>Diet X genotype | 3.256<br>0.014<br>1.235      | 0.0795<br>0.9081<br>0.2739            |
|                                       | Female | 0.2 ± 0.03 | 0.15 ± 0.02 | 0.3 ± 0.02 | 0.3 ± 0.02 | Diet<br>Genotype                    | 5.744<br>5.869               | <b>0.0220</b><br><b>0.0207</b>        |

|             |        |              |             |             |             |                 |       |         |
|-------------|--------|--------------|-------------|-------------|-------------|-----------------|-------|---------|
|             |        |              |             |             |             | Diet X genotype | 1.098 | 0.3019  |
| PC ae C30:1 | Male   | 0.3 ± 0.06   | 0.2 ± 0.04  | 0.3 ± 0.05  | 0.3 ± 0.06  | Diet            | 1.907 | 0.1758  |
|             |        |              |             |             |             | Genotype        | 0.060 | 0.8082  |
|             | Female | 0.3 ± 0.06   | 0.12 ± 0.03 | 0.19 ± 0.05 | 0.2 ± 0.03  | Diet X genotype | 0.519 | 0.4759  |
|             |        |              |             |             |             | Diet            | 0.034 | 0.8539  |
|             |        |              |             |             |             | Genotype        | 2.447 | 0.1273  |
|             |        |              |             |             |             | Diet X genotype | 2.702 | 0.1097  |
| PC ae C30:2 | Male   | 0.123 ± 0.04 | 0.1 ± 0.008 | 0.14 ± 0.02 | 0.15 ± 0.01 | Diet            | 3.107 | 0.0864  |
|             |        |              |             |             |             | Genotype        | 0.162 | 0.6902  |
|             | Female | 0.12 ± 0.01  | 0.09 ± 0.01 | 0.16 ± 0.01 | 0.17 ± 0.01 | Diet X genotype | 1.792 | 0.1891  |
|             |        |              |             |             |             | Diet            | 19.04 | 0.0001  |
|             |        |              |             |             |             | Genotype        | 0.412 | 0.5253  |
|             |        |              |             |             |             | Diet X genotype | 2.191 | 0.1478  |
| PC ae C32:1 | Male   | 0.8 ± 0.1    | 0.7 ± 0.03  | 0.9 ± 0.06  | 1.06 ± 0.08 | Diet            | 4.885 | 0.0335  |
|             |        |              |             |             |             | Genotype        | 0.459 | 0.5025  |
|             | Female | 0.7 ± 0.07   | 0.5 ± 0.03  | 0.8 ± 0.08  | 0.8 ± 0.05  | Diet X genotype | 4.203 | 0.0477  |
|             |        |              |             |             |             | Diet            | 9.496 | 0.0040  |
|             |        |              |             |             |             | Genotype        | 0.666 | 0.4199  |
|             |        |              |             |             |             | Diet X genotype | 2.206 | 0.1465  |
| PC ae C32:2 | Male   | 0.4 ± 0.03   | 0.3 ± 0.03  | 0.5 ± 0.04  | 0.5 ± 0.03  | Diet            | 22.11 | <0.0001 |
|             |        |              |             |             |             | Genotype        | 0.110 | 0.7427  |
|             | Female | 0.3 ± 0.03   | 0.3 ± 0.02  | 0.4 ± 0.04  | 0.3 ± 0.02  | Diet X genotype | 0.882 | 0.3541  |
|             |        |              |             |             |             | Diet            | 5.462 | 0.0253  |
|             |        |              |             |             |             | Genotype        | 2.968 | 0.0938  |
|             |        |              |             |             |             | Diet X genotype | 0.502 | 0.4832  |
| PC ae C34:0 | Male   | 0.5 ± 0.05   | 0.4 ± 0.05  | 0.5 ± 0.04  | 0.7 ± 0.05  | Diet            | 16.41 | 0.0003  |
|             |        |              |             |             |             | Genotype        | 2.412 | 0.1292  |
|             | Female | 0.5 ± 0.04   | 0.4 ± 0.03  | 0.7 ± 0.06  | 0.6 ± 0.06  | Diet X genotype | 5.255 | 0.0278  |
|             |        |              |             |             |             | Diet            | 12.90 | 0.0010  |
|             |        |              |             |             |             | Genotype        | 0.439 | 0.5122  |
|             |        |              |             |             |             | Diet X genotype | 0.056 | 0.8148  |
| PC ae C34:1 | Male   | 2.8 ± 0.3    | 3.3 ± 0.2   | 4.4 ± 0.4   | 4.5 ± 0.1   | Diet            | 24.48 | <0.0001 |
|             |        |              |             |             |             | Genotype        | 1.364 | 0.2506  |
|             |        |              |             |             |             | Diet X genotype | 0.361 | 0.5517  |

|             |        |            |            |            |             |                                     |                         |                             |
|-------------|--------|------------|------------|------------|-------------|-------------------------------------|-------------------------|-----------------------------|
|             | Female | 1.9 ± 0.2  | 1.9 ± 0.1  | 3.4 ± 0.2  | 3.5 ± 0.2   | Diet<br>Genotype<br>Diet X genotype | 60.13<br>0.250<br>0.027 | <0.0001<br>0.6200<br>0.8701 |
| PC ae C34:2 | Male   | 2.6 ± 0.2  | 2.9 ± 0.2  | 3.08 ± 0.2 | 3.8 ± 0.2   | Diet<br>Genotype<br>Diet X genotype | 10.73<br>6.232<br>0.695 | 0.0023<br>0.0173<br>0.4099  |
|             | Female | 1.5 ± 0.2  | 1.7 ± 0.09 | 1.6 ± 0.2  | 1.7 ± 0.1   | Diet<br>Genotype<br>Diet X genotype | 0.294<br>0.455<br>0.028 | 0.5912<br>0.5043<br>0.8689  |
| PC ae C34:3 | Male   | 0.8 ± 0.09 | 1.0 ± 0.07 | 1.2 ± 0.06 | 1.3 ± 0.1   | Diet<br>Genotype<br>Diet X genotype | 13.58<br>2.393<br>0.120 | 0.0008<br>0.1308<br>0.7310  |
|             | Female | 0.6 ± 0.07 | 0.6 ± 0.04 | 0.9 ± 0.1  | 0.8 ± 0.06  | Diet<br>Genotype<br>Diet X genotype | 12.03<br>0.557<br>1.216 | 0.0014<br>0.4605<br>0.2777  |
| PC ae C36:0 | Male   | 0.8 ± 0.06 | 0.8 ± 0.03 | 1.1 ± 0.1  | 1.2 ± 0.07  | Diet<br>Genotype<br>Diet X genotype | 33.62<br>0.890<br>0.330 | <0.0001<br>0.3517<br>0.5690 |
|             | Female | 0.6 ± 0.03 | 0.6 ± 0.06 | 0.9 ± 0.09 | 1.07 ± 0.08 | Diet<br>Genotype<br>Diet X genotype | 32.43<br>1.199<br>0.580 | <0.0001<br>0.2810<br>0.4516 |
| PC ae C36:1 | Male   | 3.0 ± 0.2  | 2.9 ± 0.1  | 4.9 ± 0.3  | 5.6 ± 0.3   | Diet<br>Genotype<br>Diet X genotype | 90.60<br>1.530<br>2.609 | <0.0001<br>0.2242<br>0.1150 |
|             | Female | 1.9 ± 0.2  | 2.03 ± 0.1 | 3.5 ± 0.3  | 3.4 ± 0.2   | Diet<br>Genotype<br>Diet X genotype | 46.35<br>0.012<br>0.117 | <0.0001<br>0.9132<br>0.7341 |
| PC ae C36:2 | Male   | 8.6 ± 0.6  | 9.8 ± 0.7  | 10.2 ± 0.8 | 11.5 ± 0.6  | Diet<br>Genotype<br>Diet X genotype | 5.394<br>3.106<br>0.013 | 0.0261<br>0.0868<br>0.9092  |
|             | Female | 5.9 ± 0.7  | 7.07 ± 0.6 | 6.6 ± 0.6  | 7.0 ± 0.4   | Diet<br>Genotype<br>Diet X genotype | 0.330<br>1.806<br>0.609 | 0.5691<br>0.1876<br>0.4403  |
| PC ae C36:3 | Male   | 1.8 ± 0.18 | 1.8 ± 0.07 | 2.3 ± 0.2  | 2.4 ± 0.1   | Diet                                | 12.04                   | 0.0014                      |

|             |        |            |             |           |            |                                                                    |                                           |                                                       |
|-------------|--------|------------|-------------|-----------|------------|--------------------------------------------------------------------|-------------------------------------------|-------------------------------------------------------|
|             | Female | 1.0 ± 0.1  | 1.0 ± 0.08  | 1.4 ± 0.1 | 1.3 ± 0.08 | Genotype<br>Diet X genotype<br>Diet<br>Genotype<br>Diet X genotype | 0.048<br>0.002<br>13.78<br>0.260<br>0.172 | 0.8280<br>0.9653<br><b>0.0007</b><br>0.6135<br>0.6810 |
| PC ae C36:4 | Male   | 1.8 ± 0.2  | 2.3 ± 0.1   | 3.7 ± 0.4 | 3.8 ± 0.3  | Diet<br>Genotype<br>Diet X genotype                                | 46.97<br>1.297<br>0.781                   | <b>&lt;0.0001</b><br>0.2623<br>0.3827                 |
|             | Female | 1.6 ± 0.2  | 1.5 ± 0.09  | 3.0 ± 0.2 | 3.0 ± 0.2  | Diet<br>Genotype<br>Diet X genotype                                | 55.93<br>0.079<br>0.09                    | <b>&lt;0.0001</b><br>0.7805<br>0.7644                 |
| PC ae C36:5 | Male   | 1.2 ± 0.08 | 1.4 ± 0.1   | 2.2 ± 0.2 | 2.4 ± 0.1  | Diet<br>Genotype<br>Diet X genotype                                | 54.90<br>1.220<br>0.018                   | <b>&lt;0.0001</b><br>0.2769<br>0.8948                 |
|             | Female | 1.2 ± 0.1  | 1.14 ± 0.08 | 2.5 ± 0.3 | 2.07 ± 0.1 | Diet<br>Genotype<br>Diet X genotype                                | 38.31<br>1.361<br>1.167                   | <b>&lt;0.0001</b><br>0.2513<br>0.2873                 |
| PC ae C38:0 | Male   | 4.09 ± 0.4 | 4.2 ± 0.2   | 3.5 ± 0.5 | 4.07 ± 0.3 | Diet<br>Genotype<br>Diet X genotype                                | 0.890<br>0.785<br>0.462                   | 0.3517<br>0.3815<br>0.5009                            |
|             | Female | 1.8 ± 0.1  | 1.9 ± 0.2   | 3.3 ± 0.3 | 3.2 ± 0.3  | Diet<br>Genotype<br>Diet X genotype                                | 42.72<br>0.014<br>0.065                   | <b>&lt;0.0001</b><br>0.9077<br>0.8004                 |
| PC ae C38:1 | Male   | 1.2 ± 0.1  | 1.05 ± 0.09 | 1.9 ± 0.2 | 2.3 ± 0.4  | Diet<br>Genotype<br>Diet X genotype                                | 20.40<br>0.501<br>1.630                   | <b>&lt;0.0001</b><br>0.4838<br>0.2099                 |
|             | Female | 0.6 ± 0.08 | 0.8 ± 0.1   | 1.6 ± 0.1 | 1.6 ± 0.2  | Diet<br>Genotype<br>Diet X genotype                                | 46.09<br>0.122<br>0.590                   | <b>&lt;0.0001</b><br>0.7286<br>0.4474                 |
| PC ae C38:2 | Male   | 6.9 ± 0.9  | 9.2 ± 1.0   | 6.0 ± 0.5 | 6.7 ± 0.5  | Diet<br>Genotype<br>Diet X genotype                                | 5.135<br>4.168<br>1.095                   | <b>0.0296</b><br><b>0.0486</b><br>0.3024              |
|             | Female | 4.02 ± 0.4 | 5.4 ± 0.6   | 3.2 ± 0.3 | 3.4 ± 0.3  | Diet<br>Genotype                                                   | 10.19<br>3.295                            | <b>0.0030</b><br>0.0781                               |

|             |        |            |            |            |             |                 |        |                   |
|-------------|--------|------------|------------|------------|-------------|-----------------|--------|-------------------|
|             |        |            |            |            |             | Diet X genotype | 1.762  | 0.1930            |
| PC ae C38:3 | Male   | 1.8 ± 0.2  | 1.9 ± 0.1  | 2.0 ± 0.1  | 2.4 ± 0.1   | Diet            | 6.226  | <b>0.0173</b>     |
|             |        |            |            |            |             | Genotype        | 4.182  | <b>0.0482</b>     |
|             |        |            |            |            |             | Diet X genotype | 1.291  | 0.2633            |
|             | Female | 1.3 ± 0.1  | 1.4 ± 0.2  | 1.9 ± 0.1  | 1.9 ± 0.13  | Diet            | 12.63  | <b>0.0011</b>     |
|             |        |            |            |            |             | Genotype        | 0.268  | 0.6083            |
|             |        |            |            |            |             | Diet X genotype | 0.173  | 0.6798            |
| PC ae C38:4 | Male   | 2.5 ± 0.2  | 2.7 ± 0.1  | 4.4 ± 0.4  | 4.3 ± 0.2   | Diet            | 48.60  | <b>&lt;0.0001</b> |
|             |        |            |            |            |             | Genotype        | 0.033  | 0.8561            |
|             |        |            |            |            |             | Diet X genotype | 0.322  | 0.5740            |
|             | Female | 2.7 ± 0.3  | 2.6 ± 0.2  | 4.2 ± 0.4  | 4.3 ± 0.2   | Diet            | 33.50  | <b>&lt;0.0001</b> |
|             |        |            |            |            |             | Genotype        | 0.0009 | 0.9758            |
|             |        |            |            |            |             | Diet X genotype | 0.065  | 0.8001            |
| PC ae C38:5 | Male   | 1.6 ± 0.1  | 1.9 ± 0.1  | 3.2 ± 0.2  | 3.6 ± 0.1   | Diet            | 126.5  | <b>&lt;0.0001</b> |
|             |        |            |            |            |             | Genotype        | 6.162  | <b>0.0178</b>     |
|             |        |            |            |            |             | Diet X genotype | 0.008  | 0.9309            |
|             | Female | 1.4 ± 0.1  | 1.4 ± 0.1  | 3.3 ± 0.2  | 3.2 ± 0.2   | Diet            | 98.01  | <b>&lt;0.0001</b> |
|             |        |            |            |            |             | Genotype        | 0.0007 | 0.9794            |
|             |        |            |            |            |             | Diet X genotype | 0.038  | 0.8461            |
| PC ae C38:6 | Male   | 1.2 ± 0.1  | 1.2 ± 0.08 | 1.9 ± 0.2  | 2.002 ± 0.1 | Diet            | 27.00  | <b>&lt;0.0001</b> |
|             |        |            |            |            |             | Genotype        | 0.557  | 0.4604            |
|             |        |            |            |            |             | Diet X genotype | 0.124  | 0.7270            |
|             | Female | 0.9 ± 0.07 | 0.8 ± 0.07 | 1.6 ± 0.2  | 1.6 ± 0.09  | Diet            | 40.19  | <b>&lt;0.0001</b> |
|             |        |            |            |            |             | Genotype        | 0.407  | 0.5277            |
|             |        |            |            |            |             | Diet X genotype | 0.313  | 0.5797            |
| PC ae C40:1 | Male   | 2.6 ± 0.2  | 2.3 ± 0.1  | 4.1 ± 0.5  | 3.8 ± 0.3   | Diet            | 23.28  | <b>&lt;0.0001</b> |
|             |        |            |            |            |             | Genotype        | 0.761  | 0.3889            |
|             |        |            |            |            |             | Diet X genotype | 0.019  | 0.8908            |
|             | Female | 1.7 ± 0.1  | 1.7 ± 0.2  | 4.05 ± 0.3 | 3.7 ± 0.4   | Diet            | 51.64  | <b>&lt;0.0001</b> |
|             |        |            |            |            |             | Genotype        | 0.517  | 0.4767            |
|             |        |            |            |            |             | Diet X genotype | 0.366  | 0.5494            |
| PC ae C40:2 | Male   | 0.7 ± 0.02 | 0.8 ± 0.05 | 0.9 ± 0.06 | 0.9 ± 0.1   | Diet            | 6.374  | <b>0.0161</b>     |
|             |        |            |            |            |             | Genotype        | 0.728  | 0.3992            |
|             |        |            |            |            |             | Diet X genotype | 0.044  | 0.8344            |

|              |        |            |            |             |             |                                     |                          |                             |
|--------------|--------|------------|------------|-------------|-------------|-------------------------------------|--------------------------|-----------------------------|
|              | Female | 0.6 ± 0.04 | 0.5 ± 0.05 | 1.01 ± 0.08 | 0.8 ± 0.07  | Diet<br>Genotype<br>Diet X genotype | 34.05<br>5.380<br>1.733  | <0.0001<br>0.0263<br>0.1966 |
| PC ae C40:3  | Male   | 0.8 ± 0.1  | 0.7 ± 0.05 | 0.8 ± 0.07  | 1.0 ± 0.05  | Diet<br>Genotype<br>Diet X genotype | 2.820<br>0.071<br>1.991  | 0.1018<br>0.7908<br>0.1668  |
|              | Female | 0.7 ± 0.06 | 0.6 ± 0.06 | 1.0 ± 0.06  | 1.0 ± 0.07  | Diet<br>Genotype<br>Diet X genotype | 26.32<br>0.062<br>0.002  | <0.0001<br>0.8047<br>0.9686 |
| PC ae C40:4  | Male   | 2.02 ± 0.1 | 2.1 ± 0.2  | 2.5 ± 0.2   | 2.4 ± 0.2   | Diet<br>Genotype<br>Diet X genotype | 4.018<br>0.004<br>0.540  | 0.0526<br>0.9486<br>0.4671  |
|              | Female | 1.8 ± 0.1  | 1.8 ± 0.2  | 2.03 ± 0.1  | 1.9 ± 0.1   | Diet<br>Genotype<br>Diet X genotype | 1.129<br>0.136<br>0.555  | 0.2953<br>0.7148<br>0.4613  |
| PC ae C40 :5 | Male   | 0.8 ± 0.06 | 0.8 ± 0.06 | 1.1 ± 0.07  | 1.2 ± 0.07  | Diet<br>Genotype<br>Diet X genotype | 29.12<br>0.226<br>0.491  | <0.0001<br>0.6372<br>0.4882 |
|              | Female | 0.8 ± 0.05 | 0.7 ± 0.06 | 1.3 ± 0.1   | 1.2 ± 0.09  | Diet<br>Genotype<br>Diet X genotype | 41.43<br>0.817<br>0.0009 | <0.0001<br>0.3723<br>0.9750 |
| PC ae C40:6  | Male   | 1.6 ± 0.2  | 1.5 ± 0.08 | 2.1 ± 0.2   | 2.3 ± 0.1   | Diet<br>Genotype<br>Diet X genotype | 16.96<br>0.033<br>0.808  | 0.0002<br>0.8560<br>0.3748  |
|              | Female | 1.5 ± 0.1  | 1.5 ± 0.2  | 2.2 ± 0.2   | 2.5 ± 0.2   | Diet<br>Genotype<br>Diet X genotype | 24.56<br>0.483<br>0.361  | <0.0001<br>0.4918<br>0.5518 |
| PC ae C42:0  | Male   | 1.6 ± 0.1  | 1.5 ± 0.1  | 1.3 ± 0.1   | 1.2 ± 0.06  | Diet<br>Genotype<br>Diet X genotype | 11.02<br>0.265<br>0.060  | 0.0021<br>0.6101<br>0.8077  |
|              | Female | 1.0 ± 0.06 | 0.9 ± 0.05 | 1.2 ± 0.09  | 1.06 ± 0.07 | Diet<br>Genotype<br>Diet X genotype | 6.504<br>1.383<br>0.089  | 0.0153<br>0.2476<br>0.7668  |
| PC ae C42:1  | Male   | 0.7 ± 0.06 | 0.6 ± 0.06 | 0.7 ± 0.09  | 0.8 ± 0.08  | Diet                                | 2.994                    | 0.0922                      |

|             |        |            |             |            |            |                                                                    |                                           |                                                           |
|-------------|--------|------------|-------------|------------|------------|--------------------------------------------------------------------|-------------------------------------------|-----------------------------------------------------------|
|             | Female | 0.6 ± 0.04 | 0.5 ± 0.07  | 0.9 ± 0.06 | 0.9 ± 0.06 | Genotype<br>Diet X genotype<br>Diet<br>Genotype<br>Diet X genotype | 0.031<br>0.548<br>26.50<br>2.624<br>0.078 | 0.8620<br>0.4639<br><b>&lt;0.0001</b><br>0.1142<br>0.7816 |
| PC ae C42:2 | Male   | 0.6 ± 0.06 | 0.5 ± 0.03  | 0.8 ± 0.07 | 0.8 ± 0.07 | Diet<br>Genotype<br>Diet X genotype                                | 27.82<br>0.034<br>2.409                   | <b>&lt;0.0001</b><br>0.8541<br>0.1294                     |
|             | Female | 0.5 ± 0.05 | 0.4 ± 0.07  | 0.9 ± 0.08 | 0.9 ± 0.08 | Diet<br>Genotype<br>Diet X genotype                                | 31.51<br>0.032<br>0.093                   | <b>&lt;0.0001</b><br>0.8599<br>0.7627                     |
| PC ae C42:3 | Male   | 1.09 ± 0.1 | 0.9 ± 0.07  | 1.7 ± 0.2  | 1.7 ± 0.2  | Diet<br>Genotype<br>Diet X genotype                                | 23.70<br>0.851<br>0.068                   | <b>&lt;0.0001</b><br>0.3624<br>0.7953                     |
|             | Female | 0.8 ± 0.06 | 0.7 ± 0.08  | 1.7 ± 0.2  | 1.7 ± 0.2  | Diet<br>Genotype<br>Diet X genotype                                | 43.40<br>0.278<br>0.193                   | <b>&lt;0.0001</b><br>0.6016<br>0.6632                     |
| PC ae C42:4 | Male   | 0.3 ± 0.04 | 0.3 ± 0.03  | 0.4 ± 0.04 | 0.5 ± 0.02 | Diet<br>Genotype<br>Diet X genotype                                | 4.132<br>1.313<br>4.223                   | <b>0.0495</b><br>0.2594<br><b>0.0472</b>                  |
|             | Female | 0.3 ± 0.03 | 0.3 ± 0.03  | 0.4 ± 0.03 | 0.4 ± 0.05 | Diet<br>Genotype<br>Diet X genotype                                | 12.34<br>0.148<br>0.150                   | <b>0.0012</b><br>0.7028<br>0.7012                         |
| PC ae C44:3 | Male   | 0.2 ± 0.02 | 0.1 ± 0.01  | 0.2 ± 0.03 | 0.2 ± 0.02 | Diet<br>Genotype<br>Diet X genotype                                | 10.46<br>1.083<br>0.606                   | <b>0.0026</b><br>0.3050<br>0.4414                         |
|             | Female | 0.2 ± 0.01 | 0.1 ± 0.02  | 0.2 ± 0.02 | 0.3 ± 0.02 | Diet<br>Genotype<br>Diet X genotype                                | 30.31<br>0.010<br>6.005                   | <b>&lt;0.0001</b><br>0.9208<br><b>0.0194</b>              |
| PC ae C44:4 | Male   | 0.2 ± 0.03 | 0.18 ± 0.01 | 0.2 ± 0.03 | 0.2 ± 0.03 | Diet<br>Genotype<br>Diet X genotype                                | 0.175<br>0.142<br>2.755                   | 0.6783<br>0.7089<br>0.1056                                |
|             | Female | 0.2 ± 0.02 | 0.18 ± 0.02 | 0.3 ± 0.03 | 0.3 ± 0.02 | Diet<br>Genotype                                                   | 25.67<br>0.353                            | <b>0.0004</b><br>0.5561                                   |

|                      |        |             |              |             |             |                 |       |                   |
|----------------------|--------|-------------|--------------|-------------|-------------|-----------------|-------|-------------------|
|                      |        |             |              |             |             | Diet X genotype | 0.114 | 0.7381            |
| PC ae C44:5          | Male   | 0.18 ± 0.02 | 0.17 ± 0.01  | 0.2 ± 0.03  | 0.3 ± 0.03  | Diet            | 9.813 | <b>0.0034</b>     |
|                      |        |             |              |             |             | Genotype        | 0.095 | 0.7594            |
|                      |        |             |              |             |             | Diet X genotype | 0.321 | 0.5746            |
|                      | Female | 0.17 ± 0.02 | 0.16 ± 0.01  | 0.2 ± 0.03  | 0.3 ± 0.03  | Diet            | 8.079 | <b>0.0074</b>     |
|                      |        |             |              |             |             | Genotype        | 0.150 | 0.7012            |
|                      |        |             |              |             |             | Diet X genotype | 0.370 | 0.5472            |
| PC ae C44:6          | Male   | 0.2 ± 0.05  | 0.17 ± 0.01  | 0.2 ± 0.02  | 0.17 ± 0.02 | Diet            | 0.303 | 0.5853            |
|                      |        |             |              |             |             | Genotype        | 2.751 | 0.1059            |
|                      |        |             |              |             |             | Diet X genotype | 0.242 | 0.6260            |
|                      | Female | 0.18 ± 0.01 | 0.1 ± 0.02   | 0.18 ± 0.02 | 0.2 ± 0.02  | Diet            | 6.223 | <b>0.0175</b>     |
|                      |        |             |              |             |             | Genotype        | 0.019 | 0.8900            |
|                      |        |             |              |             |             | Diet X genotype | 5.930 | <b>0.0201</b>     |
| <b>Sphingolipids</b> |        |             |              |             |             |                 |       |                   |
| SM(OH) C14:1         | Male   | 0.6 ± 0.04  | 0.6 ± 0.04   | 1.08 ± 0.09 | 1.08 ± 0.04 | Diet            | 71.59 | <b>&lt;0.0001</b> |
|                      |        |             |              |             |             | Genotype        | 0.218 | 0.6431            |
|                      |        |             |              |             |             | Diet X genotype | 0.191 | 0.6651            |
|                      | Female | 0.7 ± 0.04  | 0.7 ± 0.05   | 1.5 ± 0.1   | 1.6 ± 0.1   | Diet            | 101.9 | <b>&lt;0.0001</b> |
|                      |        |             |              |             |             | Genotype        | 0.711 | 0.4048            |
|                      |        |             |              |             |             | Diet X genotype | 0.346 | 0.5600            |
| SM(OH) C16:1         | Male   | 0.09 ± 0.01 | 0.09 ± 0.009 | 0.2 ± 0.02  | 0.17 ± 0.01 | Diet            | 32.51 | <b>&lt;0.0001</b> |
|                      |        |             |              |             |             | Genotype        | 0.005 | 0.9438            |
|                      |        |             |              |             |             | Diet X genotype | 0.019 | 0.8907            |
|                      | Female | 0.14 ± 0.01 | 0.14 ± 0.02  | 0.3 ± 0.04  | 0.3 ± 0.02  | Diet            | 50.66 | <b>&lt;0.0001</b> |
|                      |        |             |              |             |             | Genotype        | 0.010 | 0.9207            |
|                      |        |             |              |             |             | Diet X genotype | 0.033 | 0.8570            |
| SM(OH) C22:1         | Male   | 1.0 ± 0.4   | 0.6 ± 0.06   | 0.8 ± 0.06  | 0.8 ± 0.06  | Diet            | 0.092 | 0.7640            |
|                      |        |             |              |             |             | Genotype        | 1.118 | 0.2975            |
|                      |        |             |              |             |             | Diet X genotype | 0.985 | 0.3276            |
|                      | Female | 0.7 ± 0.06  | 0.6 ± 0.08   | 0.8 ± 0.06  | 0.9 ± 0.06  | Diet            | 6.030 | <b>0.0192</b>     |
|                      |        |             |              |             |             | Genotype        | 0.137 | 0.7139            |
|                      |        |             |              |             |             | Diet X genotype | 3.551 | 0.0678            |
| SM(OH) C22:2         | Male   | 0.7 ± 0.05  | 0.7 ± 0.07   | 0.7 ± 0.07  | 0.7 ± 0.05  | Diet            | 0.060 | 0.8073            |
|                      |        |             |              |             |             | Genotype        | 0.908 | 0.3471            |

|              |        |             |            |             |             |                                                        |                                  |                                                     |
|--------------|--------|-------------|------------|-------------|-------------|--------------------------------------------------------|----------------------------------|-----------------------------------------------------|
|              | Female | 0.5 ± 0.03  | 0.5 ± 0.03 | 0.6 ± 0.04  | 0.6 ± 0.02  | Diet X genotype<br>Diet<br>Genotype<br>Diet X genotype | 0.037<br>11.88<br>0.158<br>0.610 | 0.8484<br><b>0.0015</b><br>0.6938<br>0.4401         |
| SM(OH) C24:1 | Male   | 0.13 ± 0.01 | 0.1 ± 0.01 | 0.13 ± 0.03 | 0.15 ± 0.02 | Diet<br>Genotype<br>Diet X genotype                    | 1.242<br>0.043<br>1.344          | 0.2729<br>0.8368<br>0.2544                          |
|              | Female | 0.11 ± 0.01 | 0.1 ± 0.01 | 0.14 ± 0.02 | 0.2 ± 0.01  | Diet<br>Genotype<br>Diet X genotype                    | 19.83<br>4.475<br>7.174          | <b>&lt;0.0001</b><br><b>0.0416</b><br><b>0.0112</b> |
| SM C16:0     | Male   | 6.3 ± 0.5   | 6.7 ± 0.3  | 9.3 ± 0.5   | 10.3 ± 0.4  | Diet<br>Genotype<br>Diet X genotype                    | 62.19<br>2.505<br>0.678          | <b>&lt;0.0001</b><br>0.1225<br>0.4158               |
|              | Female | 6.7 ± 0.3   | 7.3 ± 0.4  | 12.9 ± 0.8  | 14.3 ± 0.7  | Diet<br>Genotype<br>Diet X genotype                    | 112.4<br>2.381<br>0.495          | <b>&lt;0.0001</b><br>0.1318<br>0.4863               |
| SM C16:1     | Male   | 1.3 ± 0.1   | 1.3 ± 0.09 | 1.9 ± 0.1   | 2.2 ± 0.1   | Diet<br>Genotype<br>Diet X genotype                    | 2.544<br>2.661<br>46.87          | <b>&lt;0.0001</b><br>0.1118<br>0.1197               |
|              | Female | 0.8 ± 0.06  | 0.8 ± 0.04 | 1.6 ± 0.1   | 1.6 ± 0.07  | Diet<br>Genotype<br>Diet X genotype                    | 91.10<br>0.014<br>0.0008         | <b>&lt;0.0001</b><br>0.9079<br>0.9781               |
| SM C18:0     | Male   | 2.09 ± 0.3  | 2.3 ± 0.1  | 4.3 ± 0.3   | 5.5 ± 0.3   | Diet<br>Genotype<br>Diet X genotype                    | 108.5<br>7.721<br>3.852          | <b>&lt;0.0001</b><br><b>0.0086</b><br>0.0575        |
|              | Female | 5.8 ± 0.7   | 5.3 ± 0.6  | 16.0 ± 2.0  | 15.8 ± 0.9  | Diet<br>Genotype<br>Diet X genotype                    | 75.91<br>0.090<br>0.033          | <b>&lt;0.0001</b><br>0.7656<br>0.8560               |
| SM C18:1     | Male   | 0.19 ± 0.02 | 0.2 ± 0.02 | 0.4 ± 0.02  | 0.5 ± 0.05  | Diet<br>Genotype<br>Diet X genotype                    | 66.39<br>3.139<br>1.363          | <b>&lt;0.0001</b><br>0.0852<br>0.2510               |
|              | Female | 0.3 ± 0.03  | 0.3 ± 0.03 | 0.9 ± 0.1   | 0.8 ± 0.05  | Diet<br>Genotype<br>Diet X genotype                    | 71.61<br>0.709<br>0.572          | <b>&lt;0.0001</b><br>0.4054<br>0.4547               |

|          |        |              |              |              |              |                 |        |         |
|----------|--------|--------------|--------------|--------------|--------------|-----------------|--------|---------|
| SM C20:2 | Male   | 0.03 ± 0.009 | 0.02 ± 0.005 | 0.02 ± 0.004 | 0.03 ± 0.004 | Diet            | 0.090  | 0.7658  |
|          |        |              |              |              |              | Genotype        | 0.877  | 0.3569  |
|          |        |              |              |              |              | Diet X genotype | 2.554  | 0.1212  |
|          | Female | 0.03 ± 0.005 | 0.03 ± 0.004 | 0.05 ± 0.007 | 0.05 ± 0.007 | Diet            | 5.213  | 0.0294  |
|          |        |              |              |              |              | Genotype        | 0.030  | 0.8633  |
|          |        |              |              |              |              | Diet X genotype | 0.0009 | 0.9758  |
| SM C22:3 | Male   | 0.1 ± 0.03   | 0.07 ± 0.03  | 0.3 ± 0.04   | 0.2 ± 0.03   | Diet            | 23.69  | <0.0001 |
|          |        |              |              |              |              | Genotype        | 1.884  | 0.1784  |
|          |        |              |              |              |              | Diet X genotype | 0.381  | 0.5408  |
|          | Female | 0.07 ± 0.02  | 0.06 ± 0.02  | 0.2 ± 0.03   | 0.2 ± 0.04   | Diet            | 28.85  | <0.0001 |
|          |        |              |              |              |              | Genotype        | 1.064  | 0.3093  |
|          |        |              |              |              |              | Diet X genotype | 0.345  | 0.5610  |
| SM C24:0 | Male   | 2.5 ± 0.1    | 2.7 ± 0.1    | 2.9 ± 0.1    | 3.3 ± 0.1    | Diet            | 15.66  | 0.0004  |
|          |        |              |              |              |              | Genotype        | 5.197  | 0.0288  |
|          |        |              |              |              |              | Diet X genotype | 0.095  | 0.7596  |
|          | Female | 1.4 ± 0.08   | 1.6 ± 0.1    | 2.01 ± 0.1   | 1.9 ± 0.09   | Diet            | 15.34  | 0.0004  |
|          |        |              |              |              |              | Genotype        | 0.470  | 0.4975  |
|          |        |              |              |              |              | Diet X genotype | 1.573  | 0.2181  |
| SM C24:1 | Male   | 4.3 ± 0.3    | 4.3 ± 0.3    | 3.5 ± 0.3    | 3.4 ± 0.2    | Diet            | 11.36  | 0.0018  |
|          |        |              |              |              |              | Genotype        | 0.027  | 0.8714  |
|          |        |              |              |              |              | Diet X genotype | 0.087  | 0.7701  |
|          | Female | 4.3 ± 0.2    | 4.08 ± 0.3   | 3.9 ± 0.3    | 4.2 ± 0.2    | Diet            | 0.264  | 0.6107  |
|          |        |              |              |              |              | Genotype        | 0.014  | 0.9057  |
|          |        |              |              |              |              | Diet X genotype | 0.980  | 0.3291  |
| SM C26:0 | Male   | 0.08 ± 0.06  | 0.02 ± 0.008 | 0.04 ± 0.009 | 0.04 ± 0.008 | Diet            | 0.287  | 0.5957  |
|          |        |              |              |              |              | Genotype        | 1.139  | 0.2930  |
|          |        |              |              |              |              | Diet X genotype | 0.947  | 0.3371  |
|          | Female | 0.02 ± 0.006 | 0.05 ± 0.01  | 0.04 ± 0.009 | 0.04 ± 0.008 | Diet            | 0.040  | 0.8420  |
|          |        |              |              |              |              | Genotype        | 1.498  | 0.2292  |
|          |        |              |              |              |              | Diet X genotype | 1.138  | 0.2934  |
| SM C26:1 | Male   | 0.04 ± 0.009 | 0.05 ± 0.01  | 0.04 ± 0.009 | 0.04 ± 0.008 | Diet            | 0.660  | 0.4219  |
|          |        |              |              |              |              | Genotype        | 0.429  | 0.5166  |
|          |        |              |              |              |              | Diet X genotype | 0.457  | 0.5036  |
|          | Female | 0.03 ± 0.009 | 0.02 ± 0.009 | 0.06 ± 0.01  | 0.05 ± 0.012 | Diet            | 6.462  | 0.0156  |

|                                          |        |                |               |                |                |                        |       |                   |
|------------------------------------------|--------|----------------|---------------|----------------|----------------|------------------------|-------|-------------------|
|                                          |        |                |               |                |                | <b>Genotype</b>        | 0.245 | 0.6237            |
|                                          |        |                |               |                |                | <b>Diet X genotype</b> | 0.014 | 0.9051            |
| <b>Monosaccharides</b>                   |        |                |               |                |                |                        |       |                   |
| Hexoses (H1)                             | Male   | 7670.2 ± 318.7 | 7696.7± 289.7 | 7784.7 ± 374.2 | 8668.7 ± 403.2 | <b>Diet</b>            | 2.387 | 0.1313            |
|                                          |        |                |               |                |                | <b>Genotype</b>        | 1.676 | 0.2039            |
|                                          |        |                | 5848.8± 197.6 |                | 7319.2 ± 323.9 | <b>Diet X genotype</b> | 1.487 | 0.2308            |
|                                          | Female | 6011.3 ± 308.2 |               | 7291.1 ± 399.5 |                | <b>Diet</b>            | 18.31 | <b>0.0001</b>     |
|                                          |        |                |               |                |                | <b>Genotype</b>        | 0.044 | 0.8355            |
|                                          |        |                |               |                |                | <b>Diet X genotype</b> | 0.088 | 0.7685            |
| <b>Metabolite ratios</b>                 |        |                |               |                |                |                        |       |                   |
| Monounsaturated fatty acids ((MUFA (PC)) | Male   | 249.7 ± 9.6    | 265.5 ± 18.2  | 350.3 ± 23.7   | 383.5 ± 11.1   | <b>Diet</b>            | 41.48 | <b>&lt;0.0001</b> |
|                                          |        |                |               |                |                | <b>Genotype</b>        | 2.086 | 0.1575            |
|                                          |        |                |               |                |                | <b>Diet X genotype</b> | 0.262 | 0.6122            |
|                                          | Female | 110.7 ± 10.02  | 136.03± 9.7   | 245.5 ± 17.5   | 260.1 ± 16.1   | <b>Diet</b>            | 85.36 | <b>&lt;0.0001</b> |
|                                          |        |                |               |                |                | <b>Genotype</b>        | 2.034 | 0.1627            |
|                                          |        |                |               |                |                | <b>Diet X genotype</b> | 0.148 | 0.7032            |
| Polyunsaturated fatty acids ((PUFA (PC)) | Male   | 1012.7 ± 42.9  | 1131.6± 51.0  | 1506.3 ± 98.9  | 1683 ± 64.1    | <b>Diet</b>            | 57.52 | <b>&lt;0.0001</b> |
|                                          |        |                |               |                |                | <b>Genotype</b>        | 4.604 | <b>0.0389</b>     |
|                                          |        |                |               |                |                | <b>Diet X genotype</b> | 0.176 | 0.6776            |
|                                          | Female | 656.2 ± 52.2   | 736 ± 49.2    | 1225.9 ± 90.8  | 1249.3 ± 90.4  | <b>Diet</b>            | 52.29 | <b>&lt;0.0001</b> |
|                                          |        |                |               |                |                | <b>Genotype</b>        | 0.478 | 0.4941            |
|                                          |        |                |               |                |                | <b>Diet X genotype</b> | 0.143 | 0.7080            |
| Saturated fatty acids ((SFA (PC))        | Male   | 31.7 ± 1.5     | 33.6 ± 2.1    | 32.7 ± 2.5     | 44.6 ± 2.5     | <b>Diet</b>            | 5.857 | <b>0.0208</b>     |
|                                          |        |                |               |                |                | <b>Genotype</b>        | 7.728 | <b>0.0087</b>     |
|                                          |        |                |               |                |                | <b>Diet X genotype</b> | 4.203 | <b>0.0479</b>     |
|                                          | Female | 27.7 ± 1.6     | 27.4 ± 1.7    | 40.2 ± 3.2     | 41.4 ± 3.1     | <b>Diet</b>            | 26.66 | <b>&lt;0.0001</b> |
|                                          |        |                |               |                |                | <b>Genotype</b>        | 0.031 | 0.8609            |
|                                          |        |                |               |                |                | <b>Diet X genotype</b> | 0.081 | 0.7772            |
| C2/C0                                    | Male   | 0.5 ± 0.05     | 0.6 ± 0.05    | 0.4 ± 0.01     | 0.5 ± 0.05     | <b>Diet</b>            | 6.818 | <b>0.0132</b>     |
|                                          |        |                |               |                |                | <b>Genotype</b>        | 2.513 | 0.1219            |
|                                          |        |                |               |                |                | <b>Diet X genotype</b> | 0.107 | 0.7457            |
|                                          | Female | 0.9 ± 0.1      | 0.6 ± 0.05    | 0.5 ± 0.04     | 0.5 ± 0.03     | <b>Diet</b>            | 18.23 | <b>0.0001</b>     |
|                                          |        |                |               |                |                | <b>Genotype</b>        | 3.867 | 0.0572            |
|                                          |        |                |               |                |                | <b>Diet X genotype</b> | 4.320 | <b>0.0451</b>     |

|                                   |        |                |                |               |               |                 |       |                   |
|-----------------------------------|--------|----------------|----------------|---------------|---------------|-----------------|-------|-------------------|
| C3/C0                             | Male   | 0.019 ± 0.001  | 0.026 ± 0.002  | 0.021 ± 0.002 | 0.024 ± 0.001 | Diet            | 0.010 | 0.9204            |
|                                   | Female | 0.028 ± 0.001  | 0.027 ± 0.002  | 0.021 ± 0.002 | 0.023 ± 0.001 | Genotype        | 10.42 | <b>0.0027</b>     |
| C4/C0                             | Male   | 0.029 ± 0.004  | 0.032 ± 0.003  | 0.030 ± 0.002 | 0.029 ± 0.002 | Diet X genotype | 1.590 | 0.2154            |
|                                   | Female | 0.034 ± 0.003  | 0.032 ± 0.003  | 0.031 ± 0.002 | 0.033 ± 0.002 | Diet            | 11.13 | <b>0.0020</b>     |
| C5/C0                             | Male   | 0.009 ± 0.0007 | 0.010 ± 0.0007 | 0.015 ± 0.001 | 0.015 ± 0.001 | Genotype        | 0.119 | 0.7318            |
|                                   | Female | 0.013 ± 0.001  | 0.012 ± 0.001  | 0.016 ± 0.002 | 0.017 ± 0.001 | Diet X genotype | 0.485 | 0.4907            |
| Fisher ratio                      | Male   | 2.003 ± 0.06   | 2.1 ± 0.08     | 2.8 ± 0.1     | 2.5 ± 0.1     | Diet            | 0.071 | 0.7909            |
|                                   | Female | 1.7 ± 0.06     | 1.8 ± 0.07     | 1.9 ± 0.1     | 1.8 ± 0.1     | Genotype        | 0.071 | 0.7911            |
| Branched-chain amino acids (BCAA) | Male   | 452.3 ± 37.0   | 476.3 ± 46.2   | 608.4 ± 38.9  | 663 ± 66.0    | Diet X genotype | 0.399 | 0.5314            |
|                                   | Female | 409.5 ± 34.2   | 450.8 ± 24.2   | 410.5 ± 26.6  | 485.4 ± 56.4  | Diet            | 0.088 | 0.7685            |
| Aromatic amino acids (AAA)        | Male   | 225.9 ± 17.8   | 226.4 ± 18.2   | 226.6 ± 19.7  | 299.1 ± 42.1  | Genotype        | 0.066 | 0.7992            |
|                                   | Female | 236.5 ± 21.5   | 245.1 ± 9.3    | 219.8 ± 12.7  | 263.4 ± 17.8  | Diet X genotype | 0.570 | 0.4552            |
|                                   | Male   | 0.009 ± 0.0007 | 0.010 ± 0.0007 | 0.015 ± 0.001 | 0.015 ± 0.001 | Diet            | 25.65 | <b>&lt;0.0001</b> |
|                                   | Female | 0.013 ± 0.001  | 0.012 ± 0.001  | 0.016 ± 0.002 | 0.017 ± 0.001 | Genotype        | 0.188 | 0.6669            |
|                                   | Male   | 2.003 ± 0.06   | 2.1 ± 0.08     | 2.8 ± 0.1     | 2.5 ± 0.1     | Diet X genotype | 0.499 | 0.4847            |
|                                   | Female | 1.7 ± 0.06     | 1.8 ± 0.07     | 1.9 ± 0.1     | 1.8 ± 0.1     | Diet            | 7.222 | <b>0.0109</b>     |
|                                   | Male   | 452.3 ± 37.0   | 476.3 ± 46.2   | 608.4 ± 38.9  | 663 ± 66.0    | Genotype        | 0.003 | 0.9547            |
|                                   | Female | 409.5 ± 34.2   | 450.8 ± 24.2   | 410.5 ± 26.6  | 485.4 ± 56.4  | Diet X genotype | 0.879 | 0.3548            |
|                                   | Male   | 2.003 ± 0.06   | 2.1 ± 0.08     | 2.8 ± 0.1     | 2.5 ± 0.1     | Diet            | 32.22 | <b>&lt;0.0001</b> |
|                                   | Female | 1.7 ± 0.06     | 1.8 ± 0.07     | 1.9 ± 0.1     | 1.8 ± 0.1     | Genotype        | 0.446 | 0.5086            |
|                                   | Male   | 452.3 ± 37.0   | 476.3 ± 46.2   | 608.4 ± 38.9  | 663 ± 66.0    | Diet X genotype | 2.785 | 0.1040            |
|                                   | Female | 409.5 ± 34.2   | 450.8 ± 24.2   | 410.5 ± 26.6  | 485.4 ± 56.4  | Diet            | 0.487 | 0.4897            |
|                                   | Male   | 225.9 ± 17.8   | 226.4 ± 18.2   | 226.6 ± 19.7  | 299.1 ± 42.1  | Genotype        | 0.012 | 0.9123            |
|                                   | Female | 236.5 ± 21.5   | 245.1 ± 9.3    | 219.8 ± 12.7  | 263.4 ± 17.8  | Diet X genotype | 0.734 | 0.3973            |
|                                   | Male   | 452.3 ± 37.0   | 476.3 ± 46.2   | 608.4 ± 38.9  | 663 ± 66.0    | Diet            | 12.78 | <b>0.0011</b>     |
|                                   | Female | 409.5 ± 34.2   | 450.8 ± 24.2   | 410.5 ± 26.6  | 485.4 ± 56.4  | Genotype        | 0.672 | 0.4182            |
|                                   | Male   | 225.9 ± 17.8   | 226.4 ± 18.2   | 226.6 ± 19.7  | 299.1 ± 42.1  | Diet X genotype | 0.102 | 0.7513            |
|                                   | Female | 236.5 ± 21.5   | 245.1 ± 9.3    | 219.8 ± 12.7  | 263.4 ± 17.8  | Diet            | 0.217 | 0.6442            |
|                                   | Male   | 225.9 ± 17.8   | 226.4 ± 18.2   | 226.6 ± 19.7  | 299.1 ± 42.1  | Genotype        | 2.309 | 0.1376            |
|                                   | Female | 236.5 ± 21.5   | 245.1 ± 9.3    | 219.8 ± 12.7  | 263.4 ± 17.8  | Diet X genotype | 0.193 | 0.6628            |
|                                   | Male   | 225.9 ± 17.8   | 226.4 ± 18.2   | 226.6 ± 19.7  | 299.1 ± 42.1  | Diet            | 1.858 | 0.1816            |
|                                   | Female | 236.5 ± 21.5   | 245.1 ± 9.3    | 219.8 ± 12.7  | 263.4 ± 17.8  | Genotype        | 1.837 | 0.1839            |
|                                   | Male   | 225.9 ± 17.8   | 226.4 ± 18.2   | 226.6 ± 19.7  | 299.1 ± 42.1  | Diet X genotype | 1.786 | 0.1900            |
|                                   | Female | 236.5 ± 21.5   | 245.1 ± 9.3    | 219.8 ± 12.7  | 263.4 ± 17.8  | Diet            | 0.002 | 0.9615            |

|                            |        |                 |                |                 |                 |                        |       |               |
|----------------------------|--------|-----------------|----------------|-----------------|-----------------|------------------------|-------|---------------|
|                            |        |                 |                |                 |                 | <b>Genotype</b>        | 2.552 | 0.1191        |
|                            |        |                 |                |                 |                 | <b>Diet X genotype</b> | 1.146 | 0.2917        |
| Glucogenic amino acids     | Male   | 751.4 ± 61.8    | 690.4 ± 61.0   | 683 ± 44.3      | 887.6 ± 62.5    | <b>Diet</b>            | 1.240 | 0.2730        |
|                            |        |                 |                |                 |                 | <b>Genotype</b>        | 1.542 | 0.2226        |
|                            |        |                 |                |                 |                 | <b>Diet X genotype</b> | 5.280 | <b>0.0277</b> |
|                            | Female | 697.5 ± 29.6    | 570.6 ± 16.8   | 657.9 ± 40.0    | 776.2 ± 46.9    | <b>Diet</b>            | 12.66 | <b>0.0011</b> |
|                            |        |                 |                |                 |                 | <b>Genotype</b>        | 1.278 | 0.2659        |
|                            |        |                 |                |                 |                 | <b>Diet X genotype</b> | 4.655 | <b>0.0379</b> |
| Ketogenic amino acids      | Male   | 447.3 ± 81.1    | 472.2 ± 83.5   | 558.7 ± 51.03   | 896.2 ± 158.08  | <b>Diet</b>            | 6.968 | <b>0.0122</b> |
|                            |        |                 |                |                 |                 | <b>Genotype</b>        | 3.193 | 0.0824        |
|                            |        |                 |                |                 |                 | <b>Diet X genotype</b> | 2.375 | 0.1321        |
|                            | Female | 360.4 ± 20.6    | 376.3 ± 10.3   | 451.7 ± 35.2    | 501.4 ± 44.6    | <b>Diet</b>            | 11.84 | <b>0.0015</b> |
|                            |        |                 |                |                 |                 | <b>Genotype</b>        | 1.091 | 0.3033        |
|                            |        |                 |                |                 |                 | <b>Diet X genotype</b> | 0.288 | 0.5947        |
| Essential amino acids      | Male   | 1149.7 ± 125.5  | 1017.1 ± 58.04 | 1391.7 ± 103.6  | 1680.3 ± 170.4  | <b>Diet</b>            | 14.08 | <b>0.0007</b> |
|                            |        |                 |                |                 |                 | <b>Genotype</b>        | 0.419 | 0.5221        |
|                            |        |                 |                | 1114.7 ± 79.0   |                 | <b>Diet X genotype</b> | 3.048 | 0.0901        |
|                            | Female | 1016.6 ± 65.6   | 1079.7 ± 39.5  |                 | 1297.4 ± 104.07 | <b>Diet</b>            | 4.173 | <b>0.0487</b> |
|                            |        |                 |                |                 |                 | <b>Genotype</b>        | 2.527 | 0.1209        |
|                            |        |                 |                |                 |                 | <b>Diet X genotype</b> | 0.599 | 0.4443        |
| Non-essential amino acids  | Male   | 2127.6 ± 116.8  | 2021.3 ± 98.2  | 1974.6 ± 91.15  | 2453.4 ± 131.01 | <b>Diet</b>            | 1.601 | 0.2141        |
|                            |        |                 |                |                 |                 | <b>Genotype</b>        | 2.852 | 0.1001        |
|                            |        |                 |                | 1909.2 ± 92.9   |                 | <b>Diet X genotype</b> | 7.034 | <b>0.0119</b> |
|                            | Female | 1830.4 ± 63.5   | 1764.6 ± 65.7  |                 | 2069 ± 102.6    | <b>Diet</b>            | 5.213 | <b>0.0286</b> |
|                            |        |                 |                |                 |                 | <b>Genotype</b>        | 0.313 | 0.5792        |
|                            |        |                 |                |                 |                 | <b>Diet X genotype</b> | 1.807 | 0.1875        |
| Total level of amino acids | Male   | 3175.7 ± 226.4  | 3166.7 ± 231.0 | 3366.01 ± 188.7 | 4337.2 ± 382.2  | <b>Diet</b>            | 6.470 | <b>0.0154</b> |
|                            |        |                 |                |                 |                 | <b>Genotype</b>        | 3.235 | 0.0805        |
|                            |        |                 |                |                 |                 | <b>Diet X genotype</b> | 3.357 | 0.0752        |
|                            | Female | 2846.02 ± 114.4 | 2844.3 ± 78.9  | 3023.8 ± 141.3  | 3366.3 ± 201.8  | <b>Diet</b>            | 5.864 | <b>0.0208</b> |
|                            |        |                 |                |                 |                 | <b>Genotype</b>        | 1.386 | 0.2470        |
|                            |        |                 |                |                 |                 | <b>Diet X genotype</b> | 1.431 | 0.2397        |
| Ala/total amino acids      | Male   | 0.1 ± 0.007     | 0.1 ± 0.005    | 0.1 ± 0.004     | 0.1 ± 0.004     | <b>Diet</b>            | 0.918 | 0.3445        |
|                            |        |                 |                |                 |                 | <b>Genotype</b>        | 0.017 | 0.8984        |

|                           |        |                |               |               |               |                                                        |                                  |                                                        |
|---------------------------|--------|----------------|---------------|---------------|---------------|--------------------------------------------------------|----------------------------------|--------------------------------------------------------|
|                           | Female | 0.09 ± 0.003   | 0.09 ± 0.002  | 0.1 ± 0.006   | 0.12 ± 0.004  | Diet X genotype<br>Diet<br>Genotype<br>Diet X genotype | 1.048<br>36.56<br>3.446<br>4.891 | 0.3129<br><b>&lt;0.0001</b><br>0.0718<br><b>0.0336</b> |
| Gln/total amino acids     | Male   | 0.17 ± 0.02    | 0.17 ± 0.01   | 0.15 ± 0.008  | 0.14 ± 0.01   | Diet<br>Genotype<br>Diet X genotype                    | 4.160<br>0.257<br>0.016          | <b>0.0488</b><br>0.6151<br>0.8993                      |
|                           | Female | 0.2 ± 0.012    | 0.18 ± 0.009  | 0.19 ± 0.01   | 0.17 ± 0.01   | Diet<br>Genotype<br>Diet X genotype                    | 0.504<br>4.671<br>0.343          | 0.4827<br><b>0.0376</b><br>0.5622                      |
| Ala/essential amino acids | Male   | 0.3 ± 0.02     | 0.3 ± 0.02    | 0.3 ± 0.009   | 0.2 ± 0.02    | Diet<br>Genotype<br>Diet X genotype                    | 5.719<br>0.240<br>0.028          | <b>0.0223</b><br>0.6271<br>0.8676                      |
|                           | Female | 0.3 ± 0.01     | 0.2 ± 0.01    | 0.3 ± 0.02    | 0.3 ± 0.01    | Diet<br>Genotype<br>Diet X genotype                    | 19.84<br>0.069<br>4.120          | <b>&lt;0.0001</b><br>0.7938<br><b>0.0500</b>           |
| Gln/essential amino acids | Male   | 0.6 ± 0.07     | 0.5 ± 0.04    | 0.4 ± 0.03    | 0.4 ± 0.05    | Diet<br>Genotype<br>Diet X genotype                    | 14.98<br>1.278<br>0.574          | <b>0.0005</b><br>0.2660<br>0.4537                      |
|                           | Female | 0.6 ± 0.05     | 0.5 ± 0.03    | 0.5 ± 0.05    | 0.4 ± 0.03    | Diet<br>Genotype<br>Diet X genotype                    | 0.450<br>5.573<br>0.062          | 0.5068<br><b>0.0239</b><br>0.8042                      |
| CPT 1                     | Male   | 0.01 ± 0.001   | 0.009 ± 0.001 | 0.017 ± 0.002 | 0.022 ± 0.002 | Diet<br>Genotype<br>Diet X genotype                    | 40.32<br>1.787<br>3.503          | <b>&lt;0.0001</b><br>0.1899<br>0.0696                  |
|                           | Female | 0.01 ± 0.002   | 0.011 ± 0.001 | 0.016 ± 0.001 | 0.020 ± 0.002 | Diet<br>Genotype<br>Diet X genotype                    | 29.36<br>0.0002<br>0.861         | <b>&lt;0.0001</b><br>0.9876<br>0.3599                  |
| CPT 2                     | Male   | 0.02 ± 0.002   | 0.02 ± 0.001  | 0.04 ± 0.003  | 0.05 ± 0.004  | Diet<br>Genotype<br>Diet X genotype                    | 97.89<br>0.437<br>4.821          | <b>&lt;0.0001</b><br>0.5129<br><b>0.0346</b>           |
|                           | Female | 0.016 ± 0.0008 | 0.02 ± 0.0014 | 0.06 ± 0.005  | 0.06 ± 0.004  | Diet<br>Genotype<br>Diet X genotype                    | 145.3<br>0.631<br>0.401          | <b>&lt;0.0001</b><br>0.4325<br>0.5306                  |

|           |        |              |              |              |               |                 |       |                   |
|-----------|--------|--------------|--------------|--------------|---------------|-----------------|-------|-------------------|
| SCAC/C0   | Male   | 0.6 ± 0.04   | 0.7 ± 0.05   | 0.5 ± 0.02   | 0.6 ± 0.05    | Diet            | 6.378 | <b>0.0161</b>     |
|           |        |              |              |              |               | Genotype        | 2.765 | 0.1050            |
|           |        |              |              |              |               | Diet X genotype | 0.161 | 0.6908            |
|           | Female | 1.03 ± 0.1   | 0.7 ± 0.05   | 0.5 ± 0.04   | 0.5 ± 0.03    | Diet            | 17.70 | <b>0.0002</b>     |
|           |        |              |              |              |               | Genotype        | 3.664 | 0.0638            |
|           |        |              |              |              |               | Diet X genotype | 4.348 | <b>0.0444</b>     |
| SCAC/BCAA | Male   | 0.03 ± 0.002 | 0.03 ± 0.003 | 0.01 ± 0.001 | 0.012 ± 0.002 | Diet            | 55.62 | <b>&lt;0.0001</b> |
|           |        |              |              |              |               | Genotype        | 0.444 | 0.5097            |
|           |        |              |              |              |               | Diet X genotype | 0.475 | 0.4951            |
|           | Female | 0.05 ± 0.007 | 0.03 ± 0.003 | 0.01 ± 0.001 | 0.011 ± 0.001 | Diet            | 38.88 | <b>&lt;0.0001</b> |
|           |        |              |              |              |               | Genotype        | 8.230 | <b>0.0069</b>     |
|           |        |              |              |              |               | Diet X genotype | 3.813 | 0.0589            |
