# Supplementary material for: High-Fat Diet Induces Pre-Diabetes and Distinct Sex-Specific Metabolic Alterations in Negr1-Deficient Mice
Source: Biomedicines. 2021 Sep 3;9(9):1148. doi: 10.3390/biomedicines9091148 (PMC8466019; doi:10.3390/biomedicines9091148)
Supplement: Supplementary file 1 [file biomedicines-09-01148-s001.zip › Supplementary table S2.pdf]

| Metabolites  | Sex    |                         |                        |                         |                        | Two-way ANOVA |       |        |
|--------------|--------|-------------------------|------------------------|-------------------------|------------------------|---------------|-------|--------|
|              |        | Normal diet             |                        | HFD                     |                        |               |       |        |
|              |        | Wild type<br>Mean ± SEM | Negr1-/-<br>Mean ± SEM | Wild type<br>Mean ± SEM | Negr1-/-<br>Mean ± SEM |               | F     | p      |
| Malate       | Male   | 9.9 ± 1.2               | 19.9 ± 3.7             | 7.1 ± 1.5               | 15.7 ± 2.8             | Diet          | 2.1   | 0.1574 |
|              | Female | 11.5 ± 2.8              | 17.1 ± 3.7             | 12.5 ± 2.3              | 9.7 ± 1.0              | Genotype      | 14.8  | 0.0007 |
|              |        |                         |                        |                         |                        | Interaction   | 0.08  | 0.7834 |
|              |        |                         |                        |                         |                        | Diet          | 1.72  | 0.2023 |
| Succinate    | Male   | 9.6 ± 0.8               | 16.9 ± 2.9             | 8.5 ± 1.6               | 17.5 ± 2.7             | Genotype      | 0.34  | 0.5658 |
|              | Female | 13.6 ± 2.6              | 16.1 ± 4.7             | 14.5 ± 2.4              | 10.6 ± 1.1             | Interaction   | 2.93  | 0.0998 |
|              |        |                         |                        |                         |                        | Diet          | 0.01  | 0.9126 |
|              |        |                         |                        |                         |                        | Genotype      | 14.6  | 0.0007 |
| Citrate      | Male   | 168.5 ± 52.3            | 422.6 ± 168.1          | 112.3 ± 25.2            | 283.7 ± 83.5           | Interaction   | 0.15  | 0.7001 |
|              | Female | 145.6 ± 42.2            | 377.6 ± 129.0          | 140.8 ± 65.1            | 206.5 ± 81.2           | Diet          | 0.81  | 0.3781 |
|              |        |                         |                        |                         |                        | Genotype      | 0.07  | 0.7971 |
|              |        |                         |                        |                         |                        | Interaction   | 1.54  | 0.2272 |
| Pyruvate     | Male   | 47.0 ± 7.0              | 75.4 ± 7.0             | 41.0 ± 3.4              | 58.1 ± 8.1             | Diet          | 1.16  | 0.2889 |
|              | Female | 64.0 ± 11.6             | 55.0 ± 15.8            | 56.5 ± 11.5             | 48.7 ± 4.3             | Genotype      | 5.56  | 0.0256 |
|              |        |                         |                        |                         |                        | Interaction   | 0.21  | 0.6501 |
|              |        |                         |                        |                         |                        | Diet          | 1.16  | 0.2918 |
| AKG          | Male   | 9.0 ± 1.5               | 17.0 ± 2.2             | 4.3 ± 0.6               | 10.5 ± 1.7             | Genotype      | 3.32  | 0.0808 |
|              | Female | 9.7 ± 2.1               | 10.9 ± 2.3             | 9.1 ± 2.0               | 6.7 ± 0.7              | Interaction   | 1.04  | 0.3183 |
|              |        |                         |                        |                         |                        | Diet          | 2.97  | 0.0963 |
|              |        |                         |                        |                         |                        | Genotype      | 11.4  | 0.0022 |
| Lactate      | Male   | 9.0 ± 1.5               | 14.6 ± 3.0             | 4.3 ± 0.6               | 10.5 ± 1.7             | Interaction   | 0.70  | 0.4088 |
|              | Female | 9.7 ± 2.1               | 10.9 ± 2.3             | 9.1 ± 2.0               | 6.7 ± 0.7              | Diet          | 0.39  | 0.5407 |
|              |        |                         |                        |                         |                        | Genotype      | 0.58  | 0.4533 |
|              |        |                         |                        |                         |                        | Interaction   | 0.003 | 0.9562 |
| Oxaloacetate | Male   | 2.4 ± 0.3               | 4.3 ± 0.9              | 1.3 ± 0.4               | 4.1 ± 1.8              | Diet          | 13.21 | 0.0012 |
|              | Female | 6.0 ± 1.5               | 7.0 ± 2.6              | 4.6 ± 1.3               | 2.2 ± 0.3              | Genotype      | 21.59 | 0.0001 |
|              |        |                         |                        |                         |                        | Interaction   | 0.34  | 0.5639 |
|              |        |                         |                        |                         |                        | Diet          | 1.58  | 0.2212 |
|              | Male   |                         |                        |                         |                        | Genotype      | 0.12  | 0.7283 |
|              | Female |                         |                        |                         |                        | Interaction   | 0.91  | 0.3506 |
|              |        |                         |                        |                         |                        | Diet          | 5.78  | 0.0233 |
|              |        |                         |                        |                         |                        | Genotype      | 10.61 | 0.0030 |
|              | Male   |                         |                        |                         |                        | Interaction   | 0.03  | 0.8709 |
|              | Female |                         |                        |                         |                        | Diet          | 1.58  | 0.2212 |
|              |        |                         |                        |                         |                        | Genotype      | 0.12  | 0.7283 |
|              |        |                         |                        |                         |                        | Interaction   | 0.91  | 0.3506 |
|              | Male   |                         |                        |                         |                        | Diet          | 0.42  | 0.5224 |
|              | Female |                         |                        |                         |                        | Genotype      | 4.95  | 0.0346 |
|              |        |                         |                        |                         |                        | Interaction   | 0.15  | 0.7003 |
|              |        |                         |                        |                         |                        | Diet          | 5.02  | 0.0346 |
|              | Male   |                         |                        |                         |                        | Genotype      | 0.24  | 0.6258 |
|              | Female |                         |                        |                         |                        | Interaction   | 1.45  | 0.2402 |
|              |        |                         |                        |                         |                        | Diet          |       |        |
|              |        |                         |                        |                         |                        | Genotype      |       |        |

|                      |        |             |             |             |             |                    |       |        |
|----------------------|--------|-------------|-------------|-------------|-------------|--------------------|-------|--------|
| Beta-hydroxybutyrate | Male   | 38.4 ± 5.4  | 71.0 ± 13.9 | 26.0 ± 1.9  | 53.6 ± 8.0  | <b>Diet</b>        | 3.50  | 0.0717 |
|                      | Female | 87.0 ± 11.0 | 72.4 ± 21.3 | 58.9 ± 12.6 | 59.5 ± 14.3 | <b>Genotype</b>    | 14.28 | 0.0007 |
|                      |        |             |             |             |             | <b>Interaction</b> | 0.10  | 0.7500 |
|                      |        |             |             |             |             | <b>Diet</b>        | 1.87  | 0.1843 |
|                      |        |             |             |             |             | <b>Genotype</b>    | 0.22  | 0.6455 |
|                      |        |             |             |             |             | <b>Interaction</b> | 0.26  | 0.6159 |
